# Supplementary material for: miRNA-microbiome interplay is related to Bos indicus feed efficiency
Source: Research Square preprint supplement (doi:10.21203/rs.3.rs-4744784/v1), 2024-08-09
Supplement: Supplementary file 1 [file 027da16b67d8cfb2e6da4900.xlsx]

## Sheet: Planilha2
Table S1 Primer set used to amplify 16S hypervariable regions.
Identifier	Sequence	Target	Reference
341-b-S-17F	CCTACGGGNGGCWGCAG	Bacteria	Klindworth et al., 2013
785-a-A-21R	GACTACHVGGGTATCTAATCC	Bacteria	Klindworth et al., 2014
Ar915aF	AGGAATTGGCGGGGGAGCAC	Archaea	Kittelmann et al., 2013
Ar1386R	GCGGTGTGTGCAAGGAGC	Archaea	Kittelmann et al., 2014
