# Supplementary material for: miRNA-microbiome interplay is related to Bos indicus feed efficiency
Source: Research Square preprint supplement (doi:10.21203/rs.3.rs-4744784/v1), 2024-08-09
Supplement: Supplementary file 2 [file 03d6e5fbc01b893123269a8a.xlsx]

## Sheet: Efficient
Table S6. miRNAs modules, correlation, pvalue and ASVs interaction modules from efficient and inefficient Nelore cattle groups.
Efficient
MEbrown miRNA	r	pvalue	MEred ASVs
bta-mir-205	-0.8	0.08	ASV_0	ASV_223
bta-mir-451			ASV_4	ASV_249
bta-mir-30c			ASV_5	ASV_261
bta-mir-210			ASV_13	ASV_270
bta-mir-3596			ASV_14	ASV_292
bta-mir-30b			ASV_22	ASV_307
bta-mir-130a			ASV_38	ASV_312
bta-mir-1388			ASV_56	ASV_321
			ASV_58	ASV_336
			ASV_61	ASV_348
			ASV_77	ASV_363
			ASV_117	ASV_376
			ASV_160	ASV_384
			ASV_169	ASV_434
			ASV_171	ASV_435
			ASV_173	ASV_452
			ASV_184	ASV_493
			ASV_199	ASV_613
			ASV_206	ASV_765
			ASV_216	ASV_806
				ASV_1015
MEbrown miRNAs	r	pvalue	MEblue ASVs
bta-mir-205	1	0.006	ASV_1	ASV_273
bta-mir-451			ASV_2	ASV_281
bta-mir-30c			ASV_6	ASV_286
bta-mir-210			ASV_7	ASV_289
bta-mir-3596			ASV_16	ASV_296
bta-mir-30b			ASV_18	ASV_301
bta-mir-130a			ASV_19	ASV_316
bta-mir-1388			ASV_25	ASV_324
			ASV_35	ASV_355
			ASV_54	ASV_358
			ASV_55	ASV_377
			ASV_59	ASV_400
			ASV_67	ASV_428
			ASV_71	ASV_431
			ASV_72	ASV_445
			ASV_79	ASV_516
			ASV_83	ASV_526
			ASV_90	ASV_527
			ASV_98	ASV_572
			ASV_99	ASV_579
			ASV_108	ASV_623
			ASV_128	ASV_635
			ASV_134	ASV_732
			ASV_157	ASV_759
			ASV_158	ASV_855
			ASV_175	ASV_890
			ASV_192	ASV_1047
			ASV_194	ASV_1350
			ASV_208	ASV_1381
			ASV_225	ASV_1527
MEblue miRNAs	r	pvalue	MEyellow ASVs
bta-mir-155	-0.7	0.1	ASV_30	ASV_235
bta-mir-141			ASV_33	ASV_244
bta-mir-200a			ASV_81	ASV_250
bta-mir-194-1			ASV_92	ASV_263
bta-mir-15b			ASV_93	ASV_267
bta-mir-106b			ASV_96	ASV_268
bta-mir-130b			ASV_116	ASV_276
bta-mir-200c			ASV_118	ASV_283
			ASV_125	ASV_322
			ASV_126	ASV_353
			ASV_130	ASV_356
			ASV_136	ASV_364
			ASV_139	ASV_386
			ASV_148	ASV_471
			ASV_150	ASV_477
			ASV_151	ASV_480
			ASV_156	ASV_492
			ASV_161	ASV_515
			ASV_179	ASV_559
			ASV_182	ASV_597
			ASV_203	ASV_598
			ASV_207	ASV_646
			ASV_221	ASV_737
			ASV_232	ASV_962
			ASV_233	ASV_235
MEblue miRNAs	r	pvalue	MEred ASVs
bta-mir-155	0.9	0.05	ASV_0	ASV_223
bta-mir-141			ASV_4	ASV_249
bta-mir-200a			ASV_5	ASV_261
bta-mir-194-1			ASV_13	ASV_270
bta-mir-15b			ASV_14	ASV_292
bta-mir-106b			ASV_22	ASV_307
bta-mir-130b			ASV_38	ASV_312
bta-mir-200c			ASV_56	ASV_321
			ASV_58	ASV_336
			ASV_61	ASV_348
			ASV_77	ASV_363
			ASV_117	ASV_376
			ASV_160	ASV_384
			ASV_169	ASV_434
			ASV_171	ASV_435
			ASV_173	ASV_452
			ASV_184	ASV_493
			ASV_199	ASV_613
			ASV_206	ASV_765
			ASV_216	ASV_806
				ASV 1015
MEturquoise miRNAs	r	pvalue	MEyellow ASVs
bta-mir-126	0.9	0.05	ASV_30	ASV_235
bta-mir-30a			ASV_33	ASV_244
bta-mir-196a-1			ASV_81	ASV_250
bta-mir-143			ASV_92	ASV_263
bta-mir-30d			ASV_93	ASV_267
bta-let-7d			ASV_96	ASV_268
bta-mir-1307			ASV_116	ASV_276
bta-mir-342			ASV_118	ASV_283
bta-mir-107			ASV_125	ASV_322
bta-mir-486			ASV_126	ASV_353
bta-mir-122			ASV_130	ASV_356
			ASV_136	ASV_364
			ASV_139	ASV_386
			ASV_148	ASV_471
			ASV_150	ASV_477
			ASV_151	ASV_480
			ASV_156	ASV_492
			ASV_161	ASV_515
			ASV_179	ASV_559
			ASV_182	ASV_597
			ASV_203	ASV_598
			ASV_207	ASV_646
			ASV_221	ASV_737
			ASV_232	ASV_962
			ASV_233

## Sheet: Inefficient
Supllementary Table S6. miRNAs modules, correlation, pvalue and ASVs interaction modules from efficient and inefficient group of Nelore cattle.
Inefficient
MEyellow miRNA	r	pvalue	MEyellow ASVs
bta-mir-196a	-0.8	0.06	ASV_13	ASV_220
bta-mir-27b			ASV_17	ASV_235
bta-mir-30c			ASV_41	ASV_239
bta-mir-142			ASV_46	ASV_256
bta-mir-30b			ASV_56	ASV_282
bta-mir-1307			ASV_61	ASV_283
bta-mir-342			ASV_64	ASV_287
bta-mir-146b			ASV_65	ASV_291
			ASV_66	ASV_316
			ASV_77	ASV_336
			ASV_86	ASV_337
			ASV_95	ASV_376
			ASV_139	ASV_386
			ASV_157	ASV_390
			ASV_160	ASV_421
			ASV_171	ASV_435
			ASV_173	ASV_573
			ASV_174	ASV_615
			ASV_176	ASV_737
			ASV_184	ASV_806
			ASV_206	ASV_1527
			ASV_213
MEyellow miRNA	r	pvalue	MEturquoise ASVs
bta-mir-196a	0.9	0.02	ASV_6	ASV_258
bta-mir-27b			ASV_12	ASV_261
bta-mir-30c			ASV_24	ASV_269
bta-mir-142			ASV_38	ASV_279
bta-mir-30b			ASV_40	ASV_281
bta-mir-1307			ASV_44	ASV_284
bta-mir-342			ASV_45	ASV_315
bta-mir-146b			ASV_50	ASV_318
			ASV_81	ASV_322
			ASV_87	ASV_324
			ASV_90	ASV_329
			ASV_93	ASV_358
			ASV_96	ASV_374
			ASV_105	ASV_380
			ASV_109	ASV_389
			ASV_116	ASV_417
			ASV_121	ASV_419
			ASV_124	ASV_431
			ASV_125	ASV_459
			ASV_130	ASV_477
			ASV_136	ASV_480
			ASV_138	ASV_484
			ASV_143	ASV_489
			ASV_147	ASV_492
			ASV_149	ASV_493
			ASV_153	ASV_517
			ASV_161	ASV_524
			ASV_166	ASV_526
			ASV_167	ASV_543
			ASV_172	ASV_555
			ASV_190	ASV_559
			ASV_194	ASV_616
			ASV_207	ASV_624
			ASV_223	ASV_741
			ASV_236	ASV_890
			ASV_237	ASV_900
			ASV_238	ASV_1350
MEblue miRNA	r	pvalue	MEred ASVs
bta-mir-126	0.9	0.01	ASV_8	ASV_353
bta-mir-143			ASV_28	ASV_355
bta-mir-451			ASV_48	ASV_363
bta-mir-17			ASV_62	ASV_379
bta-mir-182			ASV_82	ASV_400
bta-mir-107			ASV_88	ASV_412
bta-mir-106b			ASV_89	ASV_426
bta-mir-32			ASV_94	ASV_429
bta-mir-1388			ASV_101	ASV_434
bta-mir-484			ASV_132	ASV_452
bta-mir-130b			ASV_133	ASV_464
bta-mir-148b			ASV_162	ASV_554
bta-mir-486			ASV_191	ASV_613
			ASV_192	ASV_715
			ASV_267	ASV_759
			ASV_268	ASV_873
			ASV_302	ASV_949
			ASV_327	ASV_1450
MEblue miRNA	r	pvalue	MEblue ASVs
bta-mir-126	0.8	0.05	ASV_2	ASV_244
bta-mir-143			ASV_5	ASV_249
bta-mir-451			ASV_14	ASV_252
bta-mir-17			ASV_18	ASV_259
bta-mir-182			ASV_37	ASV_276
bta-mir-107			ASV_52	ASV_307
bta-mir-106b			ASV_73	ASV_347
bta-mir-32			ASV_98	ASV_369
bta-mir-1388			ASV_104	ASV_410
bta-mir-484			ASV_114	ASV_423
bta-mir-130b			ASV_128	ASV_436
bta-mir-148b			ASV_146	ASV_455
bta-mir-486			ASV_156	ASV_527
			ASV_170	ASV_600
			ASV_182	ASV_639
			ASV_208	ASV_844
			ASV_214	ASV_1015
			ASV_216	ASV_1253
			ASV_226
MEturquoise miRNA	r	pvalue	MEred ASVs
bta-mir-30a	0.9	0.01	ASV_8	ASV_353
bta-mir-205			ASV_28	ASV_355
bta-mir-155			ASV_48	ASV_363
bta-mir-10b			ASV_62	ASV_379
bta-mir-10174			ASV_82	ASV_400
bta-mir-200a			ASV_88	ASV_412
bta-mir-23a			ASV_89	ASV_426
bta-mir-16a			ASV_94	ASV_429
bta-let-7d			ASV_101	ASV_434
bta-mir-196b			ASV_132	ASV_452
bta-mir-15b			ASV_133	ASV_464
bta-mir-345			ASV_162	ASV_554
bta-mir-200c			ASV_191	ASV_613
			ASV_192	ASV_715
			ASV_267	ASV_759
			ASV_268	ASV_873
			ASV_302	ASV_949
			ASV_327	ASV_1450
