# Supplementary material for: miRNA-microbiome interplay is related to Bos indicus feed efficiency
Source: Research Square preprint supplement (doi:10.21203/rs.3.rs-4744784/v1), 2024-08-09
Supplement: Supplementary file 3 [file 301776cd8498a8a8e469c881.xlsx]

## Sheet: feature-table.from_biom
Table S5. Amplicon Sequence Variants (ASVs) identified in efficient and inefficient Nelore cattle groups.
ASV ID	LR04_S91	LR13_S92	LR16_S93	LR25_S94	LR30_S95	LR32_S96	LR34_S97	LR37_S98	LR40_S99	LR41_S100	LR46_S101	LR47_S102	LR55_S103	LR62_S104	LR72_S105	LR73_S106
ASV_0	147	3055	2904	3906	4938	3099	4274	7160	3596	5798	1786	952	1156	1391	6004	11717
ASV_1	3801	3060	5348	1977	1844	1348	1087	2381	934	4659	2227	707	900	542	1623	564
ASV_2	2640	2825	3814	1638	1739	2165	1186	1587	1395	5524	1649	992	1416	1370	2128	820
ASV_3	1630	1897	148	1586	4364	3315	2938	2228	309	1134	2049	153	482	790	1998	0
ASV_4	0	4681	99	3865	2654	2374	2410	993	1026	1870	0	73	0	152	307	3180
ASV_5	134	2597	588	2009	1853	4828	2166	1444	1820	2277	95	169	251	213	182	1847
ASV_6	1809	1612	3233	979	513	474	362	569	460	3290	1215	351	559	503	512	451
ASV_7	1417	1793	1977	886	679	1077	230	819	424	2174	500	460	597	732	666	306
ASV_8	356	600	1250	729	1303	820	1150	579	1846	694	1107	1644	583	1067	629	0
ASV_11	1105	611	374	2361	243	515	978	902	420	158	374	276	553	1352	608	274
ASV_12	475	542	388	690	965	720	903	681	1065	468	1481	580	335	528	828	336
ASV_13	67	217	901	1083	811	709	1342	246	1705	519	119	274	118	355	464	1435
ASV_14	278	742	673	410	154	562	433	96	547	359	492	400	130	172	172	3683
ASV_16	778	816	1196	488	371	632	314	350	311	1149	378	246	340	298	520	146
ASV_17	98	27	169	130	517	582	1181	38	1755	855	125	599	375	835	194	521
ASV_18	703	745	1023	390	403	339	311	320	253	1756	366	195	276	211	456	129
ASV_19	487	570	788	364	471	471	274	282	294	784	291	204	303	360	482	167
ASV_20	441	332	322	463	789	350	1036	416	450	425	395	180	197	272	323	157
ASV_21	306	785	0	48	635	0	783	758	475	342	818	532	417	231	0	0
ASV_22	0	438	1459	559	427	206	118	329	381	1014	0	230	237	161	130	302
ASV_23	531	567	143	644	237	302	230	834	535	0	337	107	721	522	166	0
ASV_24	292	207	105	279	309	813	803	204	215	147	1045	331	377	298	263	6
ASV_25	727	261	730	840	229	46	326	382	151	310	341	120	183	82	664	301
ASV_27	172	406	683	422	176	1212	288	114	428	283	380	162	191	425	212	26
ASV_28	235	191	131	758	694	187	342	132	337	641	0	1396	58	113	158	89
ASV_30	343	367	237	511	544	185	339	379	442	536	336	130	87	126	547	291
ASV_31	572	92	238	813	355	196	420	345	134	568	400	173	281	241	256	37
ASV_32	174	263	170	680	361	418	303	488	436	436	287	152	263	338	221	0
ASV_33	307	437	275	256	288	54	224	480	322	256	361	155	295	210	554	409
ASV_34	436	72	25	217	628	0	0	833	0	0	803	250	347	545	579	0
ASV_35	528	378	109	572	430	192	307	323	173	240	342	49	71	164	522	245
ASV_36	110	68	366	880	551	529	335	39	402	363	108	141	73	198	224	179
ASV_37	178	207	427	449	183	681	385	114	211	189	324	161	268	457	269	0
ASV_38	106	221	563	131	115	242	146	118	149	160	1396	119	76	63	107	701
ASV_39	381	167	389	64	274	607	222	182	278	293	127	296	217	408	392	87
ASV_40	220	121	0	0	376	370	726	126	205	0	483	417	181	264	444	0
ASV_41	216	154	263	313	259	352	259	140	366	277	288	141	213	361	183	12
ASV_42	290	315	126	186	306	118	270	236	388	167	247	117	239	543	248	0
ASV_44	268	146	80	217	215	305	530	133	195	162	376	243	209	378	299	0
ASV_45	97	191	514	284	0	424	0	0	79	395	559	180	265	545	149	0
ASV_46	93	64	280	554	158	292	272	57	595	433	82	303	109	111	77	88
ASV_48	91	382	0	38	4	9	819	0	404	568	230	540	108	313	0	0
ASV_50	554	89	160	231	240	195	376	65	101	115	276	255	232	141	470	0
ASV_51	289	212	266	339	352	173	453	161	339	216	148	0	113	208	205	0
ASV_52	167	117	280	203	149	313	528	124	148	116	228	164	163	279	209	277
ASV_54	191	43	269	385	632	423	99	37	494	61	0	192	338	57	82	28
ASV_55	523	313	0	845	65	286	0	0	52	173	0	72	261	68	591	72
ASV_56	91	214	544	488	126	231	68	209	275	279	155	45	10	43	144	346
ASV_57	183	639	213	127	282	79	187	233	140	189	70	17	156	474	192	0
ASV_58	83	0	126	340	242	95	115	78	104	620	87	73	316	191	134	567
ASV_59	598	244	275	189	292	162	121	422	83	160	255	41	30	51	144	63
ASV_61	0	0	173	690	325	193	0	117	590	270	0	159	11	95	62	437
ASV_62	159	275	230	258	260	172	132	234	204	52	83	300	211	408	84	32
ASV_64	0	0	202	196	168	174	273	0	876	379	0	391	111	121	72	0
ASV_65	142	0	184	477	356	148	313	0	489	254	131	149	0	96	202	0
ASV_66	0	98	555	164	229	0	500	0	680	154	0	114	0	53	291	30
ASV_67	446	151	292	72	95	175	170	328	216	160	0	145	83	63	316	118
ASV_70	110	88	188	125	673	149	76	65	243	262	113	137	31	175	103	125
ASV_71	238	254	206	270	239	105	113	165	258	211	31	0	77	110	224	155
ASV_72	181	30	0	0	259	636	70	1242	102	81	0	0	7	16	16	0
ASV_73	146	164	67	0	319	829	119	0	34	248	148	79	244	216	0	0
ASV_75	243	324	34	52	265	0	365	411	116	10	166	45	69	56	396	0
ASV_76	151	148	144	129	229	174	209	240	237	229	65	47	96	207	167	53
ASV_77	0	0	341	341	185	78	0	81	531	219	0	178	0	121	50	387
ASV_79	431	62	155	192	415	43	189	261	202	168	87	62	48	49	65	42
ASV_80	132	54	238	263	139	71	301	66	137	107	0	34	29	473	71	320
ASV_81	124	42	0	0	167	257	295	191	171	0	382	119	185	176	318	0
ASV_82	77	20	25	96	23	82	14	95	118	85	20	1614	45	88	9	10
ASV_83	501	264	132	116	45	189	145	48	82	88	26	83	45	138	332	177
ASV_84	0	0	17	161	326	405	140	593	88	171	124	59	31	76	108	0
ASV_86	121	75	122	246	168	146	301	75	332	159	89	107	91	55	109	66
ASV_87	266	76	127	194	169	97	143	146	106	147	288	106	107	149	123	0
ASV_88	123	141	0	301	119	147	208	129	115	121	140	184	97	251	155	0
ASV_89	37	200	185	117	112	96	214	129	193	57	124	313	144	164	132	0
ASV_90	191	149	276	129	125	150	0	152	0	302	220	92	92	93	159	56
ASV_92	74	248	0	158	116	0	160	257	99	56	265	157	161	237	176	0
ASV_93	111	62	0	533	54	79	0	26	55	114	186	83	17	98	687	0
ASV_94	122	76	252	80	259	90	289	36	74	230	0	282	0	56	149	54
ASV_95	132	155	165	125	108	142	135	155	219	145	98	133	72	164	77	0
ASV_96	0	23	0	68	76	58	62	0	80	74	1413	0	75	0	85	0
ASV_97	156	0	123	203	163	86	164	193	219	88	149	95	0	113	160	0
ASV_98	161	104	94	156	287	226	44	115	57	50	314	0	39	25	79	106
ASV_99	215	179	87	186	167	41	78	194	66	55	164	25	30	29	151	178
ASV_100	139	133	0	124	109	35	138	212	141	0	242	107	76	213	153	0
ASV_101	134	107	276	51	193	49	161	35	54	110	72	128	137	284	27	0
ASV_102	72	223	223	121	179	108	41	169	88	89	130	27	115	155	72	0
ASV_103	22	39	19	364	72	222	244	34	150	100	56	111	168	183	23	0
ASV_104	127	84	0	129	74	271	153	40	75	168	131	196	110	134	109	0
ASV_105	98	101	69	49	166	0	52	118	101	0	316	163	103	357	68	0
ASV_106	98	104	197	63	62	216	144	197	129	40	55	43	135	98	112	50
ASV_107	146	212	0	124	114	317	50	108	64	101	58	43	131	178	51	0
ASV_108	70	267	302	96	113	51	23	74	30	322	73	26	112	42	89	0
ASV_109	27	89	241	132	126	0	219	71	85	181	186	32	29	109	108	29
ASV_113	40	74	171	65	157	119	54	76	124	276	29	83	25	188	118	39
ASV_114	128	124	102	73	58	214	73	89	92	46	62	61	138	259	118	0
ASV_116	137	114	0	52	57	35	158	55	63	54	133	41	237	176	268	0
ASV_117	0	108	271	237	229	73	130	95	200	72	29	0	40	0	0	71
ASV_118	50	86	0	34	118	50	162	168	78	0	59	78	61	125	473	0
ASV_119	71	90	152	60	74	114	70	65	101	113	75	119	83	237	112	0
ASV_121	209	95	29	85	103	49	167	57	75	85	189	96	87	137	58	0
ASV_122	88	111	54	67	79	108	164	175	101	44	115	53	55	126	124	56
ASV_124	98	118	0	104	121	0	183	81	90	0	240	97	72	242	63	0
ASV_125	52	121	61	119	173	86	75	57	39	87	271	82	105	76	93	0
ASV_126	0	0	314	90	107	89	92	203	119	0	0	156	25	56	156	90
ASV_128	158	131	0	47	52	132	26	85	94	313	0	192	85	59	51	61
ASV_130	95	56	0	29	37	0	84	48	26	0	237	13	117	277	463	0
ASV_132	84	74	71	146	141	101	152	69	70	71	98	113	47	52	142	32
ASV_133	54	59	133	164	76	77	127	43	123	115	91	98	96	141	59	0
ASV_134	230	103	84	149	147	0	116	123	32	90	115	0	64	72	129	0
ASV_135	121	53	0	41	98	53	226	184	50	30	186	38	80	198	96	0
ASV_136	56	39	43	67	17	175	85	56	214	75	278	90	0	63	115	70
ASV_138	258	0	0	120	0	104	286	85	0	0	253	81	67	73	101	0
ASV_139	36	0	122	173	51	99	81	32	198	117	0	64	70	14	254	102
ASV_141	149	55	113	117	111	0	141	145	88	111	145	0	65	104	59	0
ASV_142	184	85	114	116	165	74	168	96	150	74	66	0	0	0	109	0
ASV_143	73	203	121	62	44	165	102	131	63	53	138	44	61	52	89	0
ASV_144	63	0	95	107	247	86	155	45	162	165	0	34	60	53	128	0
ASV_145	106	116	17	134	138	120	64	99	60	93	146	65	73	67	83	0
ASV_146	101	98	99	39	84	141	85	89	88	101	67	134	64	93	88	0
ASV_147	0	0	196	75	51	70	122	0	72	0	94	42	111	332	74	130
ASV_148	48	0	98	50	163	116	172	0	117	83	100	0	0	0	283	123
ASV_149	117	56	0	97	39	137	230	37	49	68	153	70	35	116	138	0
ASV_150	132	107	92	166	53	109	70	145	0	79	0	0	52	27	215	93
ASV_151	192	90	28	51	21	170	49	0	0	63	0	88	0	52	518	0
ASV_153	196	51	37	103	44	181	158	15	43	48	170	68	59	40	92	0
ASV_154	107	65	125	74	146	0	104	34	94	150	25	0	55	181	140	0
ASV_155	63	34	0	18	85	35	101	219	77	29	122	0	136	274	103	0
ASV_156	51	118	92	126	0	178	42	67	70	66	78	97	59	110	140	0
ASV_157	195	255	30	76	0	66	0	60	375	59	0	30	0	101	0	46
ASV_158	136	68	48	72	340	48	49	104	44	73	39	61	32	85	86	0
ASV_159	63	56	108	153	71	68	92	206	62	69	0	46	120	134	24	7
ASV_160	0	27	52	89	91	76	104	39	274	90	0	151	12	83	59	131
ASV_161	99	31	0	63	73	123	118	73	51	70	153	88	94	92	137	0
ASV_162	68	67	54	115	75	53	141	33	46	82	75	143	86	136	65	0
ASV_163	45	159	0	69	123	42	42	164	48	60	120	49	98	151	69	0
ASV_164	50	85	88	50	127	79	151	106	55	63	81	22	23	57	100	89
ASV_166	105	93	21	126	72	37	0	99	37	106	175	107	33	102	106	0
ASV_167	207	108	0	111	75	44	114	75	0	0	284	0	69	0	131	0
ASV_168	108	91	62	58	96	119	102	68	70	139	71	45	40	73	62	0
ASV_169	0	111	244	73	298	12	6	77	84	117	0	0	0	0	20	161
ASV_170	86	28	0	0	28	343	44	0	67	57	185	82	0	186	89	0
ASV_171	0	47	89	66	23	63	18	41	108	89	0	0	14	0	15	618
ASV_172	77	41	0	98	84	67	153	10	25	46	151	53	123	144	101	0
ASV_173	14	28	95	185	71	49	68	0	91	175	28	46	36	103	21	160
ASV_174	79	43	60	192	85	88	71	58	155	92	31	84	0	55	54	19
ASV_175	172	36	0	149	166	213	23	0	32	25	48	154	41	106	0	0
ASV_176	66	57	162	107	75	82	133	79	113	140	30	91	29	0	0	0
ASV_179	0	82	76	27	0	82	127	180	63	11	0	0	0	215	228	59
ASV_182	56	141	0	0	56	244	150	0	44	18	0	54	0	68	296	0
ASV_183	75	0	0	71	73	182	125	55	0	78	110	103	129	98	0	0
ASV_184	0	47	137	106	65	59	66	52	188	0	26	86	38	65	66	96
ASV_190	114	93	17	30	58	0	123	59	30	18	248	93	51	72	47	0
ASV_191	0	38	74	57	80	33	69	30	110	148	50	159	39	101	15	50
ASV_192	147	163	0	48	62	0	86	0	163	0	0	234	36	56	56	0
ASV_194	215	0	0	71	53	6	120	87	43	0	225	32	74	53	63	0
ASV_195	35	24	31	90	102	65	70	108	76	130	71	45	87	59	46	0
ASV_196	66	99	47	0	47	54	81	145	55	67	94	66	109	89	0	0
ASV_197	81	143	0	0	78	36	62	74	48	0	92	50	130	147	71	0
ASV_198	68	60	82	49	79	49	72	119	40	25	102	62	77	66	55	2
ASV_199	35	48	46	135	248	35	95	0	59	71	44	21	21	0	46	101
ASV_202	82	57	0	66	128	49	125	11	25	50	47	42	0	210	95	0
ASV_203	0	83	83	66	68	68	82	114	85	66	76	62	0	0	81	49
ASV_204	0	55	51	78	101	76	77	102	81	45	59	58	88	102	0	0
ASV_206	0	0	0	158	104	74	47	29	225	66	39	55	0	43	0	125
ASV_207	60	0	0	0	0	44	119	93	0	2	178	95	109	46	210	0
ASV_208	102	54	95	47	113	106	0	102	51	65	81	0	23	0	110	0
ASV_212	93	39	0	107	15	157	49	46	47	27	0	70	62	165	60	0
ASV_213	108	0	210	37	46	0	31	36	93	80	0	11	102	116	65	1
ASV_214	43	70	77	76	84	105	56	52	0	42	85	135	50	56	0	0
ASV_215	56	0	62	69	118	165	100	49	64	0	0	0	135	36	70	0
ASV_216	0	47	124	195	52	161	0	32	69	39	26	0	15	51	0	110
ASV_220	9	34	99	66	74	0	142	85	107	70	23	51	20	25	63	45
ASV_221	46	71	0	41	72	181	81	15	25	33	29	41	32	72	159	0
ASV_223	0	64	13	57	0	54	21	52	112	78	176	36	0	78	59	89
ASV_225	104	43	93	65	97	40	45	17	97	136	0	50	15	54	8	18
ASV_226	39	97	0	20	61	137	0	84	68	241	0	62	0	68	0	0
ASV_232	0	60	74	61	108	0	0	144	44	75	108	0	32	0	119	17
ASV_233	33	5	10	12	62	103	30	37	67	46	43	30	42	108	212	0
ASV_235	0	34	101	17	62	53	49	11	57	181	33	70	29	36	69	30
ASV_236	122	19	0	49	38	94	76	30	19	0	103	50	68	70	93	0
ASV_237	100	72	20	24	47	47	79	60	33	26	104	32	41	76	65	0
ASV_238	43	122	4	79	41	30	79	62	23	29	71	67	72	58	46	0
ASV_239	21	47	25	18	83	99	44	56	99	78	24	31	38	120	43	0
ASV_243	92	71	0	42	96	0	118	59	0	0	136	27	42	64	72	0
ASV_244	40	26	49	33	45	117	68	11	35	19	62	112	46	57	83	14
ASV_246	121	40	0	39	14	30	81	138	37	61	34	47	36	86	49	0
ASV_247	67	0	0	30	49	105	89	58	0	71	50	59	50	125	57	0
ASV_249	0	29	55	96	0	160	22	60	117	48	0	127	24	0	0	59
ASV_250	92	18	0	65	0	72	96	0	0	42	62	98	0	55	195	0
ASV_252	29	0	24	37	0	180	63	114	44	38	0	135	67	61	0	0
ASV_255	0	10	0	12	25	0	37	241	11	19	139	0	59	138	95	0
ASV_256	37	25	48	45	40	33	81	66	100	40	64	61	28	51	35	29
ASV_257	71	64	50	26	65	67	66	61	38	25	45	25	30	111	35	0
ASV_258	57	80	0	0	0	0	24	90	59	0	150	68	36	150	55	0
ASV_259	85	49	38	34	67	165	79	0	0	23	0	37	50	67	66	7
ASV_261	0	34	9	36	51	0	45	23	151	7	140	95	68	32	32	44
ASV_263	34	20	76	52	79	36	38	59	118	43	53	0	0	14	125	19
ASV_267	61	0	0	0	49	50	97	0	82	0	87	105	41	88	98	0
ASV_268	33	33	19	42	144	66	22	0	31	23	32	130	25	72	73	0
ASV_269	35	40	33	0	41	85	52	39	30	31	79	36	39	103	50	46
ASV_270	0	46	42	76	44	44	63	129	71	58	29	0	30	27	0	76
ASV_272	46	58	0	24	0	87	195	28	53	0	0	78	61	95	0	0
ASV_273	81	101	47	26	32	35	26	48	40	17	39	15	38	56	107	15
ASV_276	31	34	59	35	34	72	52	30	60	86	22	49	40	59	49	0
ASV_278	94	30	0	51	25	57	70	93	31	0	119	24	37	35	40	0
ASV_279	79	41	27	25	43	40	78	62	26	38	82	46	27	53	37	1
ASV_281	82	27	21	37	155	27	0	0	35	0	226	30	0	40	0	21
ASV_282	0	15	89	114	48	23	136	0	199	44	0	0	0	0	17	15
ASV_283	52	46	54	84	22	27	59	0	38	94	0	52	0	47	90	32
ASV_284	11	67	0	19	49	0	43	50	20	0	184	0	46	173	31	0
ASV_286	193	31	0	0	57	24	47	106	25	43	95	0	30	0	39	0
ASV_287	2	88	0	184	25	83	136	28	99	0	6	16	0	0	21	0
ASV_289	109	46	18	46	199	0	0	139	10	15	8	0	0	0	87	8
ASV_291	18	37	62	31	56	58	0	27	52	72	30	44	36	62	52	46
ASV_292	0	26	91	35	100	36	0	71	53	50	0	31	0	53	47	90
ASV_296	62	40	41	55	49	81	0	45	32	0	0	0	93	42	60	73
ASV_301	86	108	13	82	80	0	34	95	29	22	28	24	0	0	62	0
ASV_302	54	21	99	23	16	21	23	19	0	0	87	128	26	97	48	0
ASV_304	21	44	51	27	33	47	52	51	44	96	44	46	28	0	43	25
ASV_306	43	36	15	26	31	51	40	91	24	0	0	29	75	186	0	0
ASV_307	0	34	20	118	62	71	61	52	26	29	50	35	17	16	25	31
ASV_312	0	34	82	25	67	33	61	65	70	39	0	26	0	0	34	98
ASV_315	48	35	1	0	78	37	57	0	83	16	104	60	43	51	0	15
ASV_316	34	19	22	0	17	30	0	11	304	14	33	64	39	7	34	0
ASV_318	0	64	0	28	0	59	69	51	45	54	71	52	37	53	43	0
ASV_321	15	71	63	0	53	26	52	39	49	67	17	42	40	21	30	36
ASV_322	0	53	5	23	45	64	65	33	0	0	98	35	0	86	86	28
ASV_323	0	0	0	61	5	88	66	22	92	41	0	48	65	111	21	0
ASV_324	57	0	40	0	0	45	0	46	78	18	102	63	0	60	83	27
ASV_327	48	84	15	27	0	0	123	0	13	55	0	74	54	0	120	0
ASV_329	48	0	0	143	0	54	41	0	71	22	94	0	32	57	46	0
ASV_336	0	0	72	68	56	67	58	39	74	41	35	0	0	0	40	48
ASV_337	17	14	60	0	39	50	21	14	70	156	0	57	13	60	0	25
ASV_344	36	77	0	57	84	55	53	26	93	0	40	19	19	12	15	0
ASV_347	79	40	0	30	22	61	72	11	40	42	32	0	12	135	0	0
ASV_348	0	0	8	57	162	27	58	33	99	52	23	0	0	0	0	50
ASV_349	29	38	50	38	27	92	24	29	43	0	33	37	42	50	34	0
ASV_353	0	0	0	33	50	18	26	63	68	177	0	81	0	0	30	17
ASV_355	24	11	66	44	19	30	0	15	50	45	79	122	26	17	11	0
ASV_356	0	120	92	0	53	0	60	15	25	63	0	0	40	0	79	8
ASV_358	13	447	30	37	3	0	0	0	0	0	3	3	2	8	5	0
ASV_363	0	41	81	74	0	34	65	0	55	61	47	50	0	0	0	30
ASV_364	24	24	31	48	54	44	15	21	29	21	21	27	29	61	78	10
ASV_368	50	58	0	19	33	30	68	46	51	23	26	24	40	0	62	0
ASV_369	0	53	58	0	55	59	38	53	35	0	48	37	22	49	23	0
ASV_374	44	50	34	20	13	8	42	0	46	44	58	32	37	41	15	37
ASV_376	0	0	0	0	0	33	49	41	110	76	10	0	51	30	9	111
ASV_377	187	51	39	10	16	15	10	27	0	37	35	0	53	0	39	0
ASV_379	32	0	50	32	27	18	50	20	51	30	69	77	22	23	12	0
ASV_380	55	42	0	34	31	14	44	52	0	18	63	23	18	60	56	0
ASV_384	0	13	59	0	50	52	29	0	24	83	0	17	0	43	39	93
ASV_386	31	24	50	40	28	34	37	0	36	46	0	47	14	42	46	26
ASV_389	28	46	0	0	23	43	41	41	26	15	31	14	36	85	69	0
ASV_390	43	29	0	0	32	23	22	26	74	0	22	0	67	135	24	0
ASV_396	22	0	0	0	22	0	71	73	23	0	12	66	57	116	30	0
ASV_399	81	56	0	0	15	3	69	49	40	0	32	0	51	24	69	0
ASV_400	44	44	0	38	29	18	14	35	27	0	46	61	71	20	42	0
ASV_401	42	33	24	15	44	95	40	39	48	22	23	26	0	22	16	0
ASV_410	33	38	21	42	31	42	101	23	22	0	36	18	24	44	0	0
ASV_412	0	18	0	24	57	34	53	0	15	32	12	36	49	140	0	0
ASV_416	13	0	0	44	0	44	15	96	0	0	44	71	26	66	44	0
ASV_417	48	45	0	16	29	8	41	33	16	18	89	21	17	26	55	0
ASV_419	10	50	0	30	23	0	37	53	37	12	99	43	32	30	6	0
ASV_420	44	0	0	37	8	83	9	0	7	56	22	45	21	82	47	0
ASV_421	0	0	54	73	39	18	41	0	99	35	0	30	0	52	20	0
ASV_423	66	20	17	23	27	47	72	30	19	0	43	0	30	65	0	0
ASV_424	18	51	59	0	51	23	25	0	40	39	25	32	24	27	20	25
ASV_426	18	15	15	32	35	0	34	6	25	0	0	187	0	58	33	0
ASV_428	14	50	0	20	19	31	0	33	23	207	0	17	44	0	0	0
ASV_429	4	24	0	22	16	8	63	15	15	24	0	25	62	129	50	0
ASV_430	0	25	0	34	44	59	61	46	31	12	0	46	56	42	0	0
ASV_431	45	40	0	30	31	12	31	24	21	14	47	42	31	27	59	0
ASV_434	0	0	0	67	27	34	26	33	65	51	34	70	0	17	0	21
ASV_435	26	32	57	23	45	0	0	19	67	51	0	47	39	0	0	36
ASV_436	0	29	0	51	30	63	61	0	29	58	48	28	0	45	0	0
ASV_437	28	27	0	1	24	101	88	23	47	45	0	7	0	49	1	0
ASV_445	139	13	0	0	40	0	30	40	29	0	64	0	32	0	20	18
ASV_451	0	38	0	19	32	38	85	64	0	14	43	35	0	0	50	0
ASV_452	0	0	16	27	16	34	12	46	22	21	47	65	32	15	29	33
ASV_455	39	0	0	19	39	45	35	36	0	28	37	38	16	53	28	0
ASV_459	43	30	0	19	0	0	36	21	24	0	164	24	0	30	20	0
ASV_461	34	0	0	32	0	38	54	87	17	15	0	27	31	10	54	0
ASV_464	28	30	38	0	0	31	26	19	39	61	26	35	27	25	0	8
ASV_471	39	38	0	0	0	0	28	48	23	26	45	23	30	0	83	0
ASV_477	0	0	0	9	19	23	31	0	0	9	78	42	30	25	114	0
ASV_480	11	50	0	33	20	0	23	16	7	0	37	0	7	18	156	0
ASV_484	28	27	12	12	30	10	15	36	26	18	66	20	17	30	29	0
ASV_489	66	16	0	41	0	22	95	0	0	23	58	0	34	5	9	0
ASV_492	22	41	0	39	19	0	36	28	19	0	53	19	29	0	61	0
ASV_493	13	18	23	0	0	0	6	8	0	36	199	5	0	6	7	45
ASV_496	31	35	0	16	32	50	14	28	0	19	14	23	35	44	23	0
ASV_498	24	38	0	12	13	0	48	70	34	7	71	0	12	34	0	0
ASV_515	6	3	9	43	5	1	35	52	0	10	57	0	44	33	45	0
ASV_516	54	19	0	3	2	0	6	29	43	0	43	8	115	8	12	0
ASV_517	27	8	21	16	15	25	40	0	0	35	34	29	34	46	12	0
ASV_524	33	21	14	13	19	25	17	32	11	13	64	12	30	32	0	0
ASV_526	56	14	0	0	21	0	21	41	29	15	51	44	29	14	0	0
ASV_527	23	27	0	17	31	55	6	31	22	46	5	13	19	12	28	0
ASV_541	14	19	0	0	0	0	0	66	17	6	55	13	32	58	44	0
ASV_543	32	18	0	0	0	0	35	22	17	0	41	32	31	67	26	0
ASV_554	22	24	0	37	12	0	29	0	36	11	27	39	14	47	14	0
ASV_555	0	0	0	34	12	38	0	34	36	0	61	21	31	39	0	6
ASV_559	0	7	0	18	5	47	15	0	22	10	102	38	7	22	16	0
ASV_563	0	15	0	19	24	22	39	19	0	0	18	0	28	86	38	0
ASV_572	86	22	0	7	13	0	0	28	11	7	26	0	26	41	32	0
ASV_573	30	0	13	36	35	32	24	0	30	32	0	30	0	37	0	0
ASV_578	14	12	0	7	40	25	39	19	22	0	18	13	51	23	12	0
ASV_579	25	5	0	0	73	0	0	61	11	0	44	10	10	23	32	0
ASV_597	0	0	0	30	24	18	18	29	28	26	21	7	24	26	28	3
ASV_598	7	3	0	24	4	32	7	45	39	29	3	0	17	32	38	0
ASV_600	26	17	6	9	27	22	21	21	17	31	23	0	21	21	16	0
ASV_602	16	58	25	15	18	0	29	13	0	24	0	0	26	53	0	0
ASV_613	0	0	1	1	28	0	49	24	0	0	0	45	30	34	22	37
ASV_615	9	0	0	20	16	18	38	0	48	29	0	16	0	61	0	14
ASV_616	3	11	0	2	61	11	4	18	0	12	50	33	21	39	3	0
ASV_617	25	29	0	9	25	0	25	45	0	0	37	0	22	26	24	0
ASV_623	44	0	0	0	17	0	18	45	27	10	17	21	33	32	0	0
ASV_624	25	16	0	21	28	0	19	0	13	15	65	0	31	30	0	0
ASV_625	0	16	35	25	16	10	27	27	27	21	15	0	7	26	11	0
ASV_633	0	14	1	17	13	22	69	33	0	0	15	28	0	17	29	0
ASV_635	40	12	5	16	34	2	15	23	8	14	24	0	0	31	20	13
ASV_636	0	12	27	16	11	28	28	0	22	31	9	18	0	33	11	9
ASV_639	10	17	13	21	12	26	36	17	22	11	14	26	0	12	14	0
ASV_645	0	0	0	19	10	17	21	31	0	21	0	43	21	52	14	0
ASV_646	10	31	0	0	11	14	15	37	0	33	14	16	16	15	36	0
ASV_658	15	0	0	19	23	0	30	36	17	21	15	0	0	50	16	0
ASV_675	0	0	5	24	49	6	8	0	42	49	0	28	0	16	6	0
ASV_683	11	18	17	15	11	16	26	33	0	0	25	14	6	14	21	0
ASV_689	0	0	0	28	18	40	23	16	10	13	18	20	23	9	7	0
ASV_703	23	9	0	0	11	0	15	25	0	0	23	6	17	62	27	0
ASV_715	13	16	0	0	22	12	0	0	30	24	21	32	11	24	10	0
ASV_732	35	30	0	30	27	4	0	13	0	26	17	11	0	0	0	16
ASV_737	0	44	64	0	6	6	6	12	22	0	1	20	3	7	17	0
ASV_741	25	11	0	10	0	0	25	26	0	12	36	12	19	15	15	0
ASV_759	22	11	21	0	10	16	0	16	22	18	17	20	9	7	12	0
ASV_765	11	4	15	15	23	15	11	10	19	17	0	8	9	11	13	19
ASV_773	18	49	0	0	13	8	14	32	0	0	0	15	16	18	14	0
ASV_806	0	1	27	0	0	22	1	0	20	60	2	0	0	15	14	23
ASV_844	1	0	0	9	8	32	0	24	27	18	0	18	22	10	0	0
ASV_855	23	27	11	16	0	6	0	12	0	35	9	0	12	0	15	0
ASV_873	0	12	20	9	16	0	16	0	11	14	4	18	0	17	11	14
ASV_876	24	12	0	0	27	0	27	13	25	0	10	0	4	10	9	0
ASV_890	6	3	8	22	0	34	0	21	0	2	40	0	18	0	2	0
ASV_900	0	18	11	0	5	19	21	17	9	0	23	0	11	0	19	0
ASV_929	1	34	0	0	0	0	5	30	2	1	2	26	21	19	1	0
ASV_949	7	10	14	6	13	0	17	6	8	20	5	14	0	4	7	7
ASV_962	0	0	0	5	14	0	9	12	9	22	11	8	0	21	25	0
ASV_987	0	9	8	0	11	17	18	8	0	0	7	9	15	15	13	0
ASV_1015	0	6	16	0	0	9	0	8	8	21	4	6	8	11	11	14
ASV_1032	0	14	8	17	20	0	0	15	14	7	5	14	0	5	0	0
ASV_1047	19	12	0	14	8	0	0	18	5	8	13	0	14	0	5	0
ASV_1156	3	5	1	10	5	22	5	2	10	6	0	10	12	5	1	0
ASV_1253	12	2	0	6	4	12	12	0	0	2	0	9	9	0	15	0
ASV_1350	15	1	0	0	6	0	1	7	0	0	20	1	3	1	18	0
ASV_1368	10	6	0	10	13	1	9	8	0	0	1	0	7	7	0	0
ASV_1381	13	4	0	0	9	2	3	9	2	5	0	3	6	0	15	0
ASV_1450	2	0	0	10	3	0	18	3	0	0	2	10	9	2	5	0
ASV_1527	8	1	6	2	6	0	0	0	9	2	6	0	12	0	6	0
