# Supplementary material for: miRNA-microbiome interplay is related to Bos indicus feed efficiency
Source: Research Square preprint supplement (doi:10.21203/rs.3.rs-4744784/v1), 2024-08-09
Supplement: Supplementary file 4 [file 3f24f2132d9996f8a7f90c5a.xlsx]

## Sheet: Planilha1
Table S2. Ful list of expressed fecal miRNAs identified by STAR software between efficient and inefficient Nelore cattle groups.
miRNAs	./STAR/13T_Fez.clean.fastq	./STAR/16T_Fez.clean.fastq	./STAR/25T_Fez.clean.fastq	./STAR/30T_Fez.clean.fastq	./STAR/32T_Fez.clean.fastq	./STAR/34T_Fez.clean.fastq	./STAR/37T_Fez.clean.fastq	./STAR/40T_Fez.clean.fastq	./STAR/46T_Fez.clean.fastq	./STAR/47T_Fez.clean.fastq	./STAR/4T_Fez.clean.fastq	./STAR/62T_Fez.clean.fastq	./STAR/72T_Fez.clean.fastq	./STAR/73T_Fez.clean.fastq	./STAR/41T_Fez.clean.fastq	./STAR/55T_Fez.clean.fastq
bta-mir-143_1	86	1	53	42	104	91	42	44	105	18	41	54	1097	42	32	12
bta-mir-192_2	10317	146	13930	8952	8253	20460	8955	14656	24352	2282	3732	14743	1902	2926	1234	1167
bta-mir-10a_3	2557	26	3433	2014	1386	2947	2130	1893	4696	491	604	3252	2430	1832	3769	1124
bta-mir-10b_4	5776	24	5425	2641	4556	11403	4515	5657	8213	2223	1570	4796	5562	5456	876	456
bta-mir-27b_5	286	4	400	215	234	886	357	442	1423	102	147	436	1241	672	999	654
bta-mir-145_6	0	0	0	1	0	0	0	0	1	1	0	0	2	0	5	7
bta-mir-30a_7	30	3	19	19	16	26	12	9	26	9	15	22	534	19	28	34
bta-mir-215_8	1798	34	2750	1291	1222	2711	1135	2752	2775	210	447	2795	1875	2158	234	398
bta-mir-126_9	7	0	5	2	5	8	4	5	9	0	7	7	245	10	11	9
bta-mir-141_10	525	9	700	603	273	1277	527	629	1042	122	235	821	1147	970	789	367
bta-mir-30d_11	56	0	74	59	42	93	44	74	124	10	20	78	182	82	35	32
bta-mir-186_12	164	2	248	161	122	378	137	200	428	27	43	223	535	252	345	234
bta-mir-10174_13	11	0	18	5	11	42	14	14	20	4	5	23	20	14	15	18
bta-mir-27a_14	37	1	50	22	14	76	36	51	71	7	11	17	117	75	78	56
bta-mir-30c_15	15	1	10	10	4	27	14	14	31	3	10	21	33	16	25	22
bta-mir-28_16	33	0	65	38	25	111	47	45	112	6	14	57	121	62	68	38
bta-mir-3596_17	53	0	73	40	33	110	70	106	122	13	24	69	136	64	62	42
bta-mir-100_18	0	0	1	0	0	0	0	0	2	0	0	0	11	0	0	0
bta-mir-200a_19	135	3	167	104	59	288	148	319	299	81	39	203	236	252	245	189
bta-mir-125a_20	2	0	0	0	1	1	0	0	1	0	0	0	12	4	7	2
bta-mir-142_21	59	0	104	176	29	78	87	48	433	20	35	165	201	46	48	69
bta-mir-181c_22	2	0	1	1	1	1	0	0	3	0	0	0	0	1	1	1
bta-mir-411a_23	1	0	0	0	2	0	0	1	0	0	1	1	20	0	0	12
bta-mir-23a_24	25	0	26	16	7	70	31	28	31	9	10	48	36	27	23	26
bta-mir-16b_25	40	0	53	43	26	71	55	54	79	12	13	62	92	43	48	46
bta-mir-378-2_26	69	1	89	48	54	121	41	89	165	19	25	73	98	66	69	72
bta-mir-30b_27	26	0	53	31	26	68	43	36	92	11	15	44	65	25	23	33
bta-mir-429_28	135	0	169	86	90	168	66	159	255	17	25	89	210	92	123	157
bta-mir-16a_29	16	1	33	8	7	45	24	23	27	11	11	15	30	25	11	22
bta-mir-195_30	0	0	0	0	0	0	0	0	0	0	0	0	4	0	5	5
bta-mir-205_31	2	0	7	2	0	1	0	1	6	1	2	5	2	3	7	9
bta-mir-486_32	137	2	21	14	358	29	25	35	78	8	11	22	108	14	56	64
bta-mir-99a_33	1	0	1	0	0	0	1	0	0	0	0	0	4	0	9	5
bta-mir-93_34	10	0	20	16	10	30	15	10	37	1	6	34	36	19	2	2
bta-mir-182_35	52	0	54	18	35	71	37	65	65	9	9	37	111	52	57	43
bta-mir-194-1_36	49	1	81	47	37	136	62	111	87	12	25	101	49	126	0	38
bta-mir-490_37	0	0	0	0	0	0	0	0	0	0	0	0	0	0	0	0
bta-mir-204_38	0	0	0	0	0	0	0	1	2	0	0	0	5	0	5	0
bta-let-7d_39	5	0	5	4	5	18	17	12	25	6	3	11	20	9	24	9
bta-mir-148b_40	3	0	10	3	5	9	5	9	18	0	1	4	17	6	4	14
bta-mir-29c_41	0	0	2	3	0	9	7	15	7	0	1	3	7	4	8	3
bta-mir-1307_42	4	0	12	8	3	21	9	7	28	2	4	10	30	10	0	0
bta-mir-342_43	12	0	10	5	6	3	10	9	24	2	1	9	21	10	23	18
bta-mir-130a_44	6	0	5	2	0	2	1	2	4	0	1	2	3	2	39	30
bta-mir-194-2_45	20	0	44	32	9	80	34	56	55	5	14	57	39	43	0	0
bta-mir-30f_46	0	0	0	0	0	0	0	0	0	0	0	0	6	0	0	0
bta-mir-200c_47	14	1	27	7	6	25	9	19	23	5	3	13	19	15	18	6
bta-mir-301a_48	0	0	1	0	2	1	0	1	1	0	0	0	3	0	4	14
bta-mir-199b_49	0	0	0	0	1	0	0	0	0	0	0	0	1	0	7	11
bta-mir-146a_50	6	0	4	0	4	5	8	7	11	0	2	0	13	9	5	0
bta-mir-451_51	45	0	3	3	38	11	6	12	25	0	7	6	17	3	5	0
bta-mir-196b_52	20	0	47	12	8	63	25	31	33	8	8	14	47	31	33	19
bta-mir-4449_53	15	0	17	23	16	52	29	39	54	4	10	11	45	17	52	1
bta-mir-125b-2_54	0	0	0	0	0	0	0	0	1	0	0	0	0	0	1	12
bta-mir-497_55	0	0	0	0	0	0	0	0	0	0	0	0	4	1	0	0
bta-mir-425_56	7	0	5	19	3	19	6	13	26	4	4	19	21	9	22	5
bta-mir-107_57	1	0	4	0	2	5	6	2	4	0	1	1	9	1	6	18
bta-mir-15b_58	12	2	27	6	5	26	16	17	16	6	4	15	21	21	7	20
bta-mir-708_59	0	0	0	0	2	0	0	0	0	0	0	0	2	0	0	7
bta-mir-152_60	0	0	0	0	0	0	0	0	1	0	1	0	4	0	1	1
bta-mir-31_61	2	0	3	2	0	2	4	0	5	0	1	4	7	0	0	8
bta-mir-106b_62	5	0	6	4	7	10	11	9	16	1	2	7	9	11	10	0
bta-mir-146b_63	9	0	6	5	3	9	6	4	20	2	1	5	6	4	0	0
bta-mir-139_64	6	0	9	3	4	16	7	18	7	1	5	4	9	10	3	0
bta-mir-769_65	3	0	1	1	2	3	0	1	1	1	0	0	1	0	5	3
bta-mir-32_66	2	0	6	2	5	11	1	2	9	0	1	6	3	4	0	0
bta-mir-214_67	0	0	0	0	0	0	0	0	0	0	0	0	2	0	2	1
bta-mir-147_68	4	0	1	7	1	10	5	5	7	1	0	3	9	5	7	1
bta-mir-210_69	1	0	9	9	1	7	10	7	6	0	3	5	10	3	7	0
bta-mir-181d_70	0	0	0	0	0	0	0	0	1	0	0	0	0	0	1	0
bta-mir-155_71	4	0	3	0	3	3	0	1	6	1	1	4	6	5	9	0
bta-mir-122_72	0	0	1	3	0	3	1	4	1	0	1	1	81	3	0	0
bta-mir-339a_73	0	0	1	0	0	0	0	0	0	0	0	0	4	0	0	1
bta-mir-193a_74	0	0	0	0	0	1	0	0	0	0	0	0	6	0	1	4
bta-mir-181a-1_75	0	0	0	0	0	0	0	0	0	0	0	1	2	0	0	0
bta-mir-1388_76	1	0	3	1	7	6	2	2	6	0	2	5	9	1	1	0
bta-mir-484_77	1	0	0	0	2	2	2	4	7	0	1	1	3	3	1	0
bta-mir-196a-1_78	4	1	5	1	1	4	4	1	12	0	2	9	19	5	2	2
bta-mir-345_79	2	0	0	3	2	3	1	3	6	1	0	3	3	1	4	1
bta-mir-34a_80	0	0	2	1	0	4	4	6	3	0	1	0	1	1	1	4
bta-mir-17_81	1	0	3	1	2	8	3	1	1	0	0	1	4	1	1	3
bta-mir-7858_82	0	0	4	2	0	14	1	3	5	0	3	1	4	4	0	2
bta-mir-2419_83	1	0	1	1	2	0	1	1	1	0	0	2	2	2	2	1
bta-mir-130b_84	4	0	2	1	3	7	2	4	8	0	0	4	1	5	0	10
bta-mir-150_85	5	0	1	0	1	3	0	1	3	0	3	2	12	1	0	2
bta-mir-410_86	0	0	0	0	0	0	0	0	0	0	0	0	1	0	0	2
bta-mir-125b-1_87	0	0	0	0	0	0	0	0	0	0	0	0	0	0	0	0
bta-mir-338_88	0	0	0	1	0	1	0	0	5	0	0	0	2	0	0	0
bta-mir-499_89	0	0	0	0	0	1	0	0	0	0	0	0	0	0	1	0
bta-mir-2336_90	0	0	0	0	0	3	0	1	2	0	2	1	0	2	3	0
bta-mir-33b_91	0	0	0	0	0	1	1	0	2	0	2	1	4	2	3	0
bta-let-7a-3_92	0	0	0	0	0	1	0	0	0	0	0	0	0	0	0	0
bta-mir-2299_93	0	0	0	0	0	0	0	0	0	0	0	0	0	0	0	0
bta-mir-2284ab_94	1	0	1	0	0	3	0	2	1	0	0	0	2	0	2	2
bta-mir-744_95	1	0	1	0	0	4	1	2	3	0	0	0	3	1	1	1
bta-mir-326_96	0	0	0	0	0	0	0	0	3	0	0	0	0	0	0	0
bta-mir-24-2_97	0	0	1	1	0	1	0	0	0	0	0	0	0	0	2	0
bta-mir-19a_98	1	0	0	0	0	2	1	1	0	0	0	0	2	1	1	0
bta-mir-335_99	0	0	1	0	0	1	0	0	0	0	0	0	1	0	0	2
bta-mir-6524_100	1	0	2	1	0	2	1	2	1	0	0	1	1	0	0	4
bta-mir-378c_101	0	0	0	0	0	0	1	2	3	1	0	0	0	1	0	0
bta-mir-26a-2_102	1	0	0	0	1	1	0	0	0	0	0	0	0	0	2	0
bta-mir-33a_103	0	0	0	0	0	0	0	0	0	0	0	0	4	1	0	0
bta-mir-10182_104	0	0	0	0	0	0	0	0	0	0	0	0	0	0	0	0
bta-let-7a-2_105	0	0	0	0	0	1	0	1	0	0	0	2	1	0	1	3
bta-mir-454_106	0	0	0	1	0	1	0	0	0	0	0	0	0	0	0	1
bta-mir-874_107	0	0	0	0	0	0	0	0	0	0	0	0	2	0	0	0
bta-mir-495_108	0	0	5	1	0	0	0	0	1	0	0	1	0	0	0	0
bta-mir-877_109	1	0	1	0	0	1	0	0	0	0	0	4	2	0	3	3
bta-mir-6522_110	0	0	0	0	0	0	0	0	0	0	0	0	0	0	0	0
bta-mir-330_111	0	0	0	0	0	0	0	0	0	0	0	0	1	0	0	0
bta-mir-324_112	0	0	0	0	0	1	0	0	0	0	0	0	0	3	0	0
bta-mir-199a-1_113	0	0	0	0	0	0	0	0	0	0	0	0	0	0	0	0
bta-mir-184_114	0	0	2	0	1	4	1	0	3	0	0	3	1	0	0	0
bta-mir-6123_115	0	0	0	0	1	0	0	0	0	0	0	1	0	0	0	0
bta-mir-144_116	2	0	0	0	0	0	0	0	0	0	0	0	1	0	0	0
bta-mir-181b-2_117	0	0	1	0	0	0	0	0	0	0	0	0	0	0	0	0
bta-mir-628_118	0	0	0	0	0	0	0	1	0	0	0	0	0	0	0	0
bta-mir-379_119	0	0	0	0	0	0	0	0	0	0	0	0	0	0	0	0
bta-mir-3432a-2_120	0	0	0	0	0	0	0	0	0	0	0	0	0	0	0	1
bta-mir-3660_121	0	0	0	0	0	0	0	0	0	0	0	0	0	0	0	0
bta-mir-199c_122	0	0	0	0	0	0	0	0	0	0	0	0	0	0	1	0
bta-mir-190a_123	0	0	0	0	0	0	0	0	0	0	0	0	0	0	1	0
bta-mir-181a-2_124	0	0	1	0	0	0	0	0	0	1	0	0	0	0	0	0
bta-mir-11984_125	0	0	1	0	0	0	2	1	0	0	0	0	0	1	0	0
bta-mir-655_126	0	0	0	0	0	0	0	0	0	0	0	0	0	0	0	0
bta-mir-2285z_127	0	0	1	0	0	1	0	1	0	0	0	0	0	0	0	0
bta-mir-885_128	0	0	0	0	0	0	0	0	0	0	0	0	5	0	0	0
bta-mir-6521_129	0	0	0	0	0	0	0	0	0	0	0	0	0	0	0	0
bta-mir-96_130	0	0	0	0	1	1	0	1	0	0	0	0	1	0	0	1
bta-mir-760_131	0	0	0	0	0	0	0	0	0	0	0	0	0	0	0	0
bta-mir-6120_132	1	0	0	1	0	0	0	0	1	0	0	0	1	0	0	0
bta-mir-2399_133	0	0	0	0	0	0	0	0	0	0	0	0	0	0	0	0
bta-mir-2285p_134	0	0	0	0	0	0	0	0	0	0	0	0	0	0	1	4
bta-mir-218-1_135	0	0	0	0	0	0	0	0	0	0	0	0	0	0	1	0
bta-mir-10172_136	0	0	0	0	0	0	0	0	0	0	0	1	4	1	0	0
bta-mir-10164_137	0	0	0	3	0	0	0	0	1	0	0	1	0	1	0	0
bta-mir-7861_138	0	0	0	0	0	0	0	0	0	0	0	0	0	0	0	0
bta-mir-543_139	0	0	0	0	0	0	0	0	0	0	0	0	0	0	0	1
bta-mir-2443_140	0	0	0	0	0	1	0	0	1	0	0	0	0	0	0	0
bta-mir-211_141	1	0	1	0	0	0	0	0	0	0	0	2	1	0	0	0
bta-mir-11989_142	0	0	0	0	0	0	0	0	0	0	0	0	0	0	0	0
bta-mir-3956_143	0	0	0	0	0	0	0	0	0	0	0	0	0	0	0	0
bta-mir-378b_144	0	0	0	0	0	0	0	0	0	0	0	0	0	0	0	0
bta-mir-339b_145	0	0	0	0	0	0	0	0	0	0	0	0	0	0	0	0
bta-mir-2376_146	0	0	1	0	0	0	0	0	0	0	0	0	0	0	0	0
bta-mir-95_147	0	0	0	0	0	0	0	0	0	0	0	0	0	0	0	0
bta-mir-654_148	0	0	0	0	0	0	0	0	0	0	0	0	0	0	0	0
bta-mir-6523a_149	0	0	1	0	0	0	0	0	0	0	0	0	0	0	0	0
bta-mir-6122_150	0	0	1	0	0	0	0	0	1	0	1	0	0	0	0	0
bta-mir-539_151	0	0	0	0	0	0	0	0	0	0	0	0	1	0	0	0
bta-mir-383_152	0	0	0	0	0	0	0	0	0	0	0	0	0	0	0	0
bta-mir-376c_153	0	0	0	0	0	0	0	0	0	0	0	0	0	0	0	0
bta-mir-301b_154	0	0	0	0	0	0	0	0	0	0	0	0	0	0	0	0
bta-mir-2344_155	0	0	0	0	0	0	0	0	0	0	0	0	0	0	0	0
bta-mir-2285be_156	0	0	0	0	0	2	0	0	0	0	0	0	1	0	0	0
bta-mir-2285b-1_157	0	0	0	0	0	0	0	0	0	0	0	0	0	0	0	0
bta-mir-219-2_158	0	0	0	0	0	0	0	0	0	0	0	0	0	0	0	0
bta-mir-12052_159	0	0	0	0	0	2	0	0	0	0	0	0	0	0	0	0
bta-mir-11973_160	0	0	1	0	0	0	0	0	0	0	0	0	0	0	0	0
bta-mir-103-1_161	0	0	0	0	0	0	0	1	1	0	0	0	1	0	0	1
bta-mir-10225b_162	0	0	0	0	0	1	0	0	0	0	0	0	1	1	1	0
