# Supplementary material for: miRNA-microbiome interplay is related to Bos indicus feed efficiency
Source: Research Square preprint supplement (doi:10.21203/rs.3.rs-4744784/v1), 2024-08-09
Supplement: Supplementary file 5 [file d70268baf496a34b3fa9a8dd.xlsx]

## Sheet: bta-mir-27b
Supplementary Table S3. Signalling pathways constructed by WebGestalt software for each DE miRNA’s target genes list.
ID: bta04930; Name: Type II diabetes mellitus
size=46; overlap=4; expect=0.23; enrichmentRatio=17.63; PValue=7.162e-5; FDR=1.142e-2
User ID	Gene Symbol	Gene Name	Entrez Gene
IRS1	IRS1	insulin receptor substrate 1	538598
PIK3R3	PIK3R3	phosphoinositide-3-kinase regulatory subunit 3	286865
MAPK10	MAPK10	mitogen-activated protein kinase 10	537631
TNF	TNF	tumor necrosis factor	280943
ID: bta04931; Name: Insulin resistance
size=109; overlap=6; expect=0.54; enrichmentRatio=11.16; PValue=1.372e-5; FDR=4.377e-3
User ID	Gene Symbol	Gene Name	Entrez Gene
CREB1	CREB1	cAMP responsive element binding protein 1	281713
IRS1	IRS1	insulin receptor substrate 1	538598
PIK3R3	PIK3R3	phosphoinositide-3-kinase regulatory subunit 3	286865
MAPK10	MAPK10	mitogen-activated protein kinase 10	537631
TNF	TNF	tumor necrosis factor	280943
GSK3B	GSK3B	glycogen synthase kinase 3 beta	790875
ID: bta04668; Name: TNF signaling pathway
size=115; overlap=5; expect=0.57; enrichmentRatio=8.81; PValue=2.341e-4; FDR=1.867e-2
User ID	Gene Symbol	Gene Name	Entrez Gene
CREB1	CREB1	cAMP responsive element binding protein 1	281713
DAB2IP	DAB2IP	DAB2 interacting protein	541268
PIK3R3	PIK3R3	phosphoinositide-3-kinase regulatory subunit 3	286865
MAPK10	MAPK10	mitogen-activated protein kinase 10	537631
TNF	TNF	tumor necrosis factor	280943
ID: bta04910; Name: Insulin signaling pathway
size=137; overlap=5; expect=0.68; enrichmentRatio=7.40; PValue=5.262e-4; FDR=2.798e-2
User ID	Gene Symbol	Gene Name	Entrez Gene
MKNK2	MKNK2	MAP kinase interacting serine/threonine kinase 2	538519
IRS1	IRS1	insulin receptor substrate 1	538598
PIK3R3	PIK3R3	phosphoinositide-3-kinase regulatory subunit 3	286865
MAPK10	MAPK10	mitogen-activated protein kinase 10	537631
GSK3B	GSK3B	glycogen synthase kinase 3 beta	790875

## Sheet: bta-mir-126
Supplementary Table S3. Signalling pathways constructed by WebGestalt software for each DE miRNA’s target genes list.
ID: bta04150; Name: mTOR signaling pathway
size=152; overlap=52; expect=27.25; enrichmentRatio=1.91; PValue=9.100e-7; FDR=9.676e-5
User ID	Gene Symbol	Gene Name	Entrez Gene
FZD3	FZD3	frizzled class receptor 3	445419
RHEB	RHEB	Ras homolog, mTORC1 binding	528204
FLCN	FLCN	folliculin	526652
WNT16	WNT16	Wnt family member 16	538627
RPS6KA6	RPS6KA6	ribosomal protein S6 kinase A6	526227
RRAGC	RRAGC	Ras related GTP binding C	617367
LRP6	LRP6	LDL receptor related protein 6	536328
GRB2	GRB2	growth factor receptor bound protein 2	535298
PRKAA1	PRKAA1	protein kinase AMP-activated catalytic subunit alpha 1	540404
SOS2	SOS2	SOS Ras/Rho guanine nucleotide exchange factor 2	100138040
PRKAA2	PRKAA2	protein kinase AMP-activated catalytic subunit alpha 2	538954
PTEN	PTEN	phosphatase and tensin homolog	540786
CLIP1	CLIP1	CAP-Gly domain containing linker protein 1	534624
SKP2	SKP2	S-phase kinase associated protein 2	519018
CHUK	CHUK	conserved helix-loop-helix ubiquitous kinase	281073
IGF1	IGF1	insulin like growth factor 1	281239
RPS6KA3	RPS6KA3	ribosomal protein S6 kinase A3	511190
GSK3B	GSK3B	glycogen synthase kinase 3 beta	790875
ATP6V1A	ATP6V1A	ATPase H+ transporting V1 subunit A	282147
WNT5A	WNT5A	Wnt family member 5A	530005
FZD6	FZD6	frizzled class receptor 6	445418
FZD1	FZD1	frizzled class receptor 1	445417
NRAS	NRAS	NRAS proto-oncogene, GTPase	506322
WNT3	WNT3	Wnt family member 3	540753
CAB39L	CAB39L	calcium binding protein 39 like	519724
PRKCB	PRKCB	protein kinase C beta	282325
WNT2B	WNT2B	Wnt family member 2B	445420
FZD4	FZD4	frizzled class receptor 4	445416
RICTOR	RICTOR	RPTOR independent companion of MTOR complex 2	527459
ULK2	ULK2	unc-51 like autophagy activating kinase 2	618601
FNIP2	FNIP2	folliculin interacting protein 2	100138353
FZD2	FZD2	frizzled class receptor 2	538507
PIK3CB	PIK3CB	phosphatidylinositol-4,5-bisphosphate 3-kinase catalytic subunit beta	517948
KRAS	KRAS	KRAS proto-oncogene, GTPase	541140
WNT9B	WNT9B	Wnt family member 9B	541243
LAMTOR3	LAMTOR3	late endosomal/lysosomal adaptor, MAPK and MTOR activator 3	533155
PIK3CA	PIK3CA	phosphatidylinositol-4,5-bisphosphate 3-kinase catalytic subunit alpha	282306
WNT7A	WNT7A	Wnt family member 7A	533782
SOS1	SOS1	SOS Ras/Rac guanine nucleotide exchange factor 1	537682
PRKCA	PRKCA	protein kinase C alpha	282001
FNIP1	FNIP1	folliculin interacting protein 1	523042
RPTOR	RPTOR	regulatory associated protein of MTOR complex 1	507056
RRAGD	RRAGD	Ras related GTP binding D	541106
MIOS	MIOS	meiosis regulator for oocyte development	512321
IGF1R	IGF1R	insulin like growth factor 1 receptor	281848
SLC38A9	SLC38A9	solute carrier family 38 member 9	534045
STRADB	STRADB	STE20-related kinase adaptor beta	506029
AKT3	AKT3	AKT serine/threonine kinase 3	100137872
EIF4E	EIF4E	eukaryotic translation initiation factor 4E	281751
FZD5	FZD5	frizzled class receptor 5	538536
DVL3	DVL3	dishevelled segment polarity protein 3	539203
BRAF	BRAF	B-Raf proto-oncogene, serine/threonine kinase	536051
ID: bta04068; Name: FoxO signaling pathway
size=132; overlap=45; expect=23.67; enrichmentRatio=1.90; PValue=5.424e-6; FDR=3.068e-4
User ID	Gene Symbol	Gene Name	Entrez Gene
CDKN1B	CDKN1B	cyclin dependent kinase inhibitor 1B	512613
GRB2	GRB2	growth factor receptor bound protein 2	535298
PRKAA1	PRKAA1	protein kinase AMP-activated catalytic subunit alpha 1	540404
CCNG2	CCNG2	cyclin G2	512960
RAG2	RAG2	recombination activating 2	782387
CCND1	CCND1	cyclin D1	524530
SOS2	SOS2	SOS Ras/Rho guanine nucleotide exchange factor 2	100138040
BNIP3	BNIP3	BCL2 interacting protein 3	615342
PRKAA2	PRKAA2	protein kinase AMP-activated catalytic subunit alpha 2	538954
CDKN2B	CDKN2B	cyclin dependent kinase inhibitor 2B	527124
CAT	CAT	catalase	531682
PTEN	PTEN	phosphatase and tensin homolog	540786
SKP2	SKP2	S-phase kinase associated protein 2	519018
CHUK	CHUK	conserved helix-loop-helix ubiquitous kinase	281073
IGF1	IGF1	insulin like growth factor 1	281239
BCL6	BCL6	BCL6, transcription repressor	539020
ATG12	ATG12	autophagy related 12	767903
CREBBP	CREBBP	CREB binding protein	505453
EGF	EGF	undefined	530315
MDM2	MDM2	MDM2 proto-oncogene	540378
IRS4	IRS4	insulin receptor substrate 4	514607
STK4	STK4	serine/threonine kinase 4	514886
NRAS	NRAS	NRAS proto-oncogene, GTPase	506322
CCND2	CCND2	cyclin D2	615414
NLK	NLK	nemo like kinase	507204
PCK2	PCK2	phosphoenolpyruvate carboxykinase 2, mitochondrial	282856
IRS2	IRS2	insulin receptor substrate 2	100300012
SIRT1	SIRT1	sirtuin 1	613629
TGFBR1	TGFBR1	transforming growth factor beta receptor 1	282382
PIK3CB	PIK3CB	phosphatidylinositol-4,5-bisphosphate 3-kinase catalytic subunit beta	517948
KRAS	KRAS	KRAS proto-oncogene, GTPase	541140
PIK3CA	PIK3CA	phosphatidylinositol-4,5-bisphosphate 3-kinase catalytic subunit alpha	282306
SMAD3	SMAD3	SMAD family member 3	515125
SMAD4	SMAD4	SMAD family member 4	540248
SOS1	SOS1	SOS Ras/Rac guanine nucleotide exchange factor 1	537682
RAG1	RAG1	recombination activating 1	506302
GRM1	GRM1	glutamate metabotropic receptor 1	540485
MAPK9	MAPK9	mitogen-activated protein kinase 9	534125
SOD2	SOD2	superoxide dismutase 2	281496
IGF1R	IGF1R	insulin like growth factor 1 receptor	281848
SMAD2	SMAD2	SMAD family member 2	516010
AKT3	AKT3	AKT serine/threonine kinase 3	100137872
BRAF	BRAF	B-Raf proto-oncogene, serine/threonine kinase	536051
MAPK10	MAPK10	mitogen-activated protein kinase 10	537631
PCK1	PCK1	phosphoenolpyruvate carboxykinase 1	282855
ID: bta04510; Name: Focal adhesion
size=198; overlap=61; expect=35.50; enrichmentRatio=1.72; PValue=5.770e-6; FDR=3.068e-4
User ID	Gene Symbol	Gene Name	Entrez Gene
ITGB8	ITGB8	integrin subunit beta 8	536286
PAK2	PAK2	p21 (RAC1) activated kinase 2	513673
HGF	HGF	hepatocyte growth factor	282879
TNC	TNC	tenascin C	540664
CDC42	CDC42	cell division cycle 42	532712
GRB2	GRB2	growth factor receptor bound protein 2	535298
BIRC3	BIRC3	baculoviral IAP repeat containing 3	514386
CCND1	CCND1	cyclin D1	524530
SOS2	SOS2	SOS Ras/Rho guanine nucleotide exchange factor 2	100138040
PTEN	PTEN	phosphatase and tensin homolog	540786
IGF1	IGF1	insulin like growth factor 1	281239
CRK	CRK	CRK proto-oncogene, adaptor protein	512841
LAMA5	LAMA5	laminin subunit alpha 5	506751
THBS2	THBS2	thrombospondin 2	338092
ITGB6	ITGB6	integrin subunit beta 6	282644
ITGAV	ITGAV	integrin subunit alpha V	281875
ROCK1	ROCK1	Rho associated coiled-coil containing protein kinase 1	785911
PDGFRA	PDGFRA	platelet derived growth factor receptor alpha	282301
EGF	EGF	undefined	530315
ARHGAP5	ARHGAP5	Rho GTPase activating protein 5	788978
RELN	RELN	reelin	281450
GSK3B	GSK3B	glycogen synthase kinase 3 beta	790875
ITGA2	ITGA2	integrin subunit alpha 2	281872
COL4A3	COL4A3	collagen type IV alpha 3 chain	317711
BCL2	BCL2	BCL2, apoptosis regulator	281020
DIAPH1	DIAPH1	diaphanous related formin 1	786565
CRKL	CRKL	CRK like proto-oncogene, adaptor protein	518180
COL4A4	COL4A4	collagen type IV alpha 4 chain	407107
VEGFC	VEGFC	vascular endothelial growth factor C	282122
CCND2	CCND2	cyclin D2	615414
PRKCB	PRKCB	protein kinase C beta	282325
FLNC	FLNC	filamin C	528415
MYLK4	MYLK4	myosin light chain kinase family member 4	518025
MYLK3	MYLK3	myosin light chain kinase 3	526379
COL1A1	COL1A1	collagen type I alpha 1 chain	282187
ITGA4	ITGA4	integrin subunit alpha 4	282882
PIK3CB	PIK3CB	phosphatidylinositol-4,5-bisphosphate 3-kinase catalytic subunit beta	517948
VEGFA	VEGFA	vascular endothelial growth factor A	281572
PIK3CA	PIK3CA	phosphatidylinositol-4,5-bisphosphate 3-kinase catalytic subunit alpha	282306
LAMC1	LAMC1	laminin subunit gamma 1	532572
PDGFD	PDGFD	platelet derived growth factor D	525931
XIAP	XIAP	X-linked inhibitor of apoptosis	281647
PAK3	PAK3	p21 (RAC1) activated kinase 3	534526
SOS1	SOS1	SOS Ras/Rac guanine nucleotide exchange factor 1	537682
PRKCA	PRKCA	protein kinase C alpha	282001
COL9A1	COL9A1	collagen type IX alpha 1 chain	282195
TNR	TNR	tenascin R	526409
VAV2	VAV2	vav guanine nucleotide exchange factor 2	515718
MAPK9	MAPK9	mitogen-activated protein kinase 9	534125
CAV2	CAV2	caveolin 2	493642
IGF1R	IGF1R	insulin like growth factor 1 receptor	281848
ROCK2	ROCK2	Rho associated coiled-coil containing protein kinase 2	282041
PARVA	PARVA	parvin alpha	615430
AKT3	AKT3	AKT serine/threonine kinase 3	100137872
PPP1CB	PPP1CB	protein phosphatase 1 catalytic subunit beta	538829
PAK4	PAK4	p21 (RAC1) activated kinase 4	539742
COL9A2	COL9A2	collagen type IX alpha 2 chain	505942
BRAF	BRAF	B-Raf proto-oncogene, serine/threonine kinase	536051
MAPK10	MAPK10	mitogen-activated protein kinase 10	537631
LAMA4	LAMA4	laminin subunit alpha 4	529670
SHC3	SHC3	SHC adaptor protein 3	512696
ID: bta04010; Name: MAPK signaling pathway
size=292; overlap=81; expect=52.35; enrichmentRatio=1.55; PValue=1.673e-5; FDR=5.337e-4
User ID	Gene Symbol	Gene Name	Entrez Gene
ANGPT1	ANGPT1	angiopoietin 1	282140
EREG	EREG	epiregulin	100295476
PAK2	PAK2	p21 (RAC1) activated kinase 2	513673
FGF7	FGF7	fibroblast growth factor 7	616885
HGF	HGF	hepatocyte growth factor	282879
CDC42	CDC42	cell division cycle 42	532712
RPS6KA6	RPS6KA6	ribosomal protein S6 kinase A6	526227
IL1RAP	IL1RAP	interleukin 1 receptor accessory protein	539334
MAP3K8	MAP3K8	mitogen-activated protein kinase kinase kinase 8	535622
TAOK3	TAOK3	TAO kinase 3	534620
GRB2	GRB2	growth factor receptor bound protein 2	535298
IL1A	IL1A	interleukin 1 alpha	281250
TRAF6	TRAF6	TNF receptor associated factor 6	539124
FGF2	FGF2	fibroblast growth factor 2	281161
CSF1	CSF1	colony stimulating factor 1	281094
GNG12	GNG12	G protein subunit gamma 12	286850
PRKACB	PRKACB	protein kinase cAMP-activated catalytic subunit beta	282323
SOS2	SOS2	SOS Ras/Rho guanine nucleotide exchange factor 2	100138040
MAP3K2	MAP3K2	mitogen-activated protein kinase kinase kinase 2	504592
CHUK	CHUK	conserved helix-loop-helix ubiquitous kinase	281073
IGF1	IGF1	insulin like growth factor 1	281239
CRK	CRK	CRK proto-oncogene, adaptor protein	512841
RPS6KA3	RPS6KA3	ribosomal protein S6 kinase A3	511190
MAP3K7	MAP3K7	mitogen-activated protein kinase kinase kinase 7	529146
TAOK1	TAOK1	TAO kinase 1	536532
CACNB4	CACNB4	calcium voltage-gated channel auxiliary subunit beta 4	282161
PDGFRA	PDGFRA	platelet derived growth factor receptor alpha	282301
EGF	EGF	undefined	530315
RASA2	RASA2	RAS p21 protein activator 2	533491
NF1	NF1	neurofibromin 1	280877
CACNA2D1	CACNA2D1	calcium voltage-gated channel auxiliary subunit alpha2delta 1	282608
ERBB4	ERBB4	erb-b2 receptor tyrosine kinase 4	522419
CACNA1E	CACNA1E	calcium voltage-gated channel subunit alpha1 E	353113
TAB2	TAB2	TGF-beta activated kinase 1 (MAP3K7) binding protein 2	540203
TGFA	TGFA	transforming growth factor alpha	540388
STK4	STK4	serine/threonine kinase 4	514886
CRKL	CRKL	CRK like proto-oncogene, adaptor protein	518180
FGF1	FGF1	fibroblast growth factor 1	281160
PPP3CA	PPP3CA	protein phosphatase 3 catalytic subunit alpha	286852
NRAS	NRAS	NRAS proto-oncogene, GTPase	506322
VEGFC	VEGFC	vascular endothelial growth factor C	282122
NLK	NLK	nemo like kinase	507204
PRKCB	PRKCB	protein kinase C beta	282325
FLNC	FLNC	filamin C	528415
PPP3R2	PPP3R2	protein phosphatase 3 regulatory subunit B, beta	617585
FGFR2	FGFR2	fibroblast growth factor receptor 2	404193
MAP3K1	MAP3K1	mitogen-activated protein kinase kinase kinase 1	523962
HSPA6	HSPA6	heat shock protein family A (Hsp70) member 6	539835
ELK4	ELK4	ELK4, ETS transcription factor	540309
FLT3	FLT3	fms related tyrosine kinase 3	512700
TGFBR1	TGFBR1	transforming growth factor beta receptor 1	282382
FAS	FAS	Fas cell surface death receptor	282488
KRAS	KRAS	KRAS proto-oncogene, GTPase	541140
STK3	STK3	serine/threonine kinase 3	533815
VEGFA	VEGFA	vascular endothelial growth factor A	281572
LAMTOR3	LAMTOR3	late endosomal/lysosomal adaptor, MAPK and MTOR activator 3	533155
PDGFD	PDGFD	platelet derived growth factor D	525931
DUSP4	DUSP4	dual specificity phosphatase 4	540380
RPS6KA5	RPS6KA5	ribosomal protein S6 kinase A5	504408
ATF2	ATF2	activating transcription factor 2	509827
FGF5	FGF5	fibroblast growth factor 5	536771
SOS1	SOS1	SOS Ras/Rac guanine nucleotide exchange factor 1	537682
PRKCA	PRKCA	protein kinase C alpha	282001
TEK	TEK	TEK receptor tyrosine kinase	280939
DUSP10	DUSP10	dual specificity phosphatase 10	541175
CACNA1D	CACNA1D	calcium voltage-gated channel subunit alpha1 D	408013
CACNA2D2	CACNA2D2	calcium voltage-gated channel auxiliary subunit alpha2delta 2	785909
PPM1A	PPM1A	protein phosphatase, Mg2+/Mn2+ dependent 1A	281994
RASGRP3	RASGRP3	RAS guanyl releasing protein 3	523745
MAPK9	MAPK9	mitogen-activated protein kinase 9	534125
MAP4K4	MAP4K4	mitogen-activated protein kinase kinase kinase kinase 4	509109
RASGRF2	RASGRF2	Ras protein specific guanine nucleotide releasing factor 2	524957
IGF1R	IGF1R	insulin like growth factor 1 receptor	281848
CACNA1C	CACNA1C	calcium voltage-gated channel subunit alpha1 C	408015
AKT3	AKT3	AKT serine/threonine kinase 3	100137872
NFATC3	NFATC3	nuclear factor of activated T cells 3	541127
DUSP1	DUSP1	dual specificity phosphatase 1	539175
FGF10	FGF10	fibroblast growth factor 10	326285
BRAF	BRAF	B-Raf proto-oncogene, serine/threonine kinase	536051
TAB1	TAB1	TGF-beta activated kinase 1 (MAP3K7) binding protein 1	519958
MAPK10	MAPK10	mitogen-activated protein kinase 10	537631

## Sheet: bta-mir-143
Supplementary Table S3. Signalling pathways constructed by WebGestalt software for each DE miRNA’s target genes list.
ID: bta01521; Name: EGFR tyrosine kinase inhibitor resistance
size=80; overlap=8; expect=1.55; enrichmentRatio=5.16; PValue=1.479e-4; FDR=1.573e-2
User ID	Gene Symbol	Gene Name	Entrez Gene
KRAS	KRAS	KRAS proto-oncogene, GTPase	541140
PDGFRA	PDGFRA	platelet derived growth factor receptor alpha	282301
BCL2	BCL2	BCL2, apoptosis regulator	281020
NRG1	NRG1	neuregulin 1	281361
NRG2	NRG2	neuregulin 2	783452
IGF1R	IGF1R	insulin like growth factor 1 receptor	281848
MAPK1	MAPK1	mitogen-activated protein kinase 1	327672
IL6R	IL6R	interleukin 6 receptor	507359
ID: bta04810; Name: Regulation of actin cytoskeleton
size=210; overlap=14; expect=4.07; enrichmentRatio=3.44; PValue=5.345e-5; FDR=8.525e-3
User ID	Gene Symbol	Gene Name	Entrez Gene
ITGB6	ITGB6	integrin subunit beta 6	282644
KRAS	KRAS	KRAS proto-oncogene, GTPase	541140
FGF7	FGF7	fibroblast growth factor 7	616885
ITGA6	ITGA6	integrin subunit alpha 6	535043
PDGFRA	PDGFRA	platelet derived growth factor receptor alpha	282301
LIMK1	LIMK1	LIM domain kinase 1	535225
ITGB8	ITGB8	integrin subunit beta 8	536286
FGF1	FGF1	fibroblast growth factor 1	281160
ITGA11	ITGA11	integrin subunit alpha 11	523755
LPAR2	LPAR2	lysophosphatidic acid receptor 2	509748
MAPK1	MAPK1	mitogen-activated protein kinase 1	327672
FGF9	FGF9	undefined	613731
SSH3	SSH3	slingshot protein phosphatase 3	514643
ARHGEF1	ARHGEF1	Rho guanine nucleotide exchange factor 1	513377
ID: bta04151; Name: PI3K-Akt signaling pathway
size=373; overlap=20; expect=7.23; enrichmentRatio=2.77; PValue=3.216e-5; FDR=8.525e-3
User ID	Gene Symbol	Gene Name	Entrez Gene
ITGB6	ITGB6	integrin subunit beta 6	282644
KRAS	KRAS	KRAS proto-oncogene, GTPase	541140
FGF7	FGF7	fibroblast growth factor 7	616885
ITGA6	ITGA6	integrin subunit alpha 6	535043
COL1A1	COL1A1	collagen type I alpha 1 chain	282187
PDGFRA	PDGFRA	platelet derived growth factor receptor alpha	282301
BCL2	BCL2	BCL2, apoptosis regulator	281020
GHR	GHR	growth hormone receptor	280805
ITGB8	ITGB8	integrin subunit beta 8	536286
FGF1	FGF1	fibroblast growth factor 1	281160
EPOR	EPOR	erythropoietin receptor	281144
IGF1R	IGF1R	insulin like growth factor 1 receptor	281848
THBS1	THBS1	thrombospondin 1	281530
ITGA11	ITGA11	integrin subunit alpha 11	523755
LPAR2	LPAR2	lysophosphatidic acid receptor 2	509748
MAPK1	MAPK1	mitogen-activated protein kinase 1	327672
ERBB4	ERBB4	erb-b2 receptor tyrosine kinase 4	522419
FGF9	FGF9	undefined	613731
IL6R	IL6R	interleukin 6 receptor	507359
PDPK1	PDPK1	3-phosphoinositide dependent protein kinase 1	100138102

## Sheet: bta-mir-155
ID: bta04340; Name: Hedgehog signaling pathway
size=47; overlap=9; expect=1.12; enrichmentRatio=8.04; PValue=1.283e-6; FDR=3.736e-5
User ID	Gene Symbol	Gene Name	Entrez Gene
CSNK1G2	CSNK1G2	casein kinase 1 gamma 2	506060
KIF3A	KIF3A	kinesin family member 3A	541246
CSNK1A1	CSNK1A1	casein kinase 1 alpha 1	282684
ARRB2	ARRB2	arrestin beta 2	281638
GSK3B	GSK3B	glycogen synthase kinase 3 beta	790875
SUFU	SUFU	SUFU negative regulator of hedgehog signaling	535067
SMURF2	SMURF2	SMAD specific E3 ubiquitin protein ligase 2	540826
SHH	SHH	sonic hedgehog signaling molecule	286821
HHIP	HHIP	hedgehog interacting protein	540830
ID: bta04662; Name: B cell receptor signaling pathway
size=74; overlap=11; expect=1.76; enrichmentRatio=6.24; PValue=1.197e-6; FDR=3.736e-5
User ID	Gene Symbol	Gene Name	Entrez Gene
VAV3	VAV3	vav guanine nucleotide exchange factor 3	521961
FOS	FOS	Fos proto-oncogene, AP-1 transcription factor subunit	280795
KRAS	KRAS	KRAS proto-oncogene, GTPase	541140
PIK3CA	PIK3CA	phosphatidylinositol-4,5-bisphosphate 3-kinase catalytic subunit alpha	282306
INPP5D	INPP5D	inositol polyphosphate-5-phosphatase D	507329
RELA	RELA	RELA proto-oncogene, NF-kB subunit	508233
MAP2K1	MAP2K1	mitogen-activated protein kinase kinase 1	533199
GSK3B	GSK3B	glycogen synthase kinase 3 beta	790875
PIK3R1	PIK3R1	phosphoinositide-3-kinase regulatory subunit 1	282307
SOS1	SOS1	SOS Ras/Rac guanine nucleotide exchange factor 1	537682
CARD11	CARD11	caspase recruitment domain family member 11	515377
Supplementary Table S3. Signalling pathways constructed by WebGestalt software for each DE miRNA’s target genes list.
ID: bta04660; Name: T cell receptor signaling pathway
size=103; overlap=13; expect=2.45; enrichmentRatio=5.30; PValue=8.761e-7; FDR=3.736e-5
User ID	Gene Symbol	Gene Name	Entrez Gene
VAV3	VAV3	vav guanine nucleotide exchange factor 3	521961
FOS	FOS	Fos proto-oncogene, AP-1 transcription factor subunit	280795
KRAS	KRAS	KRAS proto-oncogene, GTPase	541140
ITK	ITK	IL2 inducible T cell kinase	522311
PIK3CA	PIK3CA	phosphatidylinositol-4,5-bisphosphate 3-kinase catalytic subunit alpha	282306
RELA	RELA	RELA proto-oncogene, NF-kB subunit	508233
CTLA4	CTLA4	cytotoxic T-lymphocyte associated protein 4	281732
MAP3K7	MAP3K7	mitogen-activated protein kinase kinase kinase 7	529146
MAP2K1	MAP2K1	mitogen-activated protein kinase kinase 1	533199
GSK3B	GSK3B	glycogen synthase kinase 3 beta	790875
PIK3R1	PIK3R1	phosphoinositide-3-kinase regulatory subunit 1	282307
SOS1	SOS1	SOS Ras/Rac guanine nucleotide exchange factor 1	537682
CARD11	CARD11	caspase recruitment domain family member 11	515377

## Sheet: bta-mir-196 a
Supplementary Table S3. Signalling pathways constructed by WebGestalt software for each DE miRNA’s target genes list.
ID: bta04014; Name: Ras signaling pathway
size=241; overlap=11; expect=2.61; enrichmentRatio=4.21; PValue=5.344e-5; FDR=1.357e-2
User ID	Gene Symbol	Gene Name	Entrez Gene
SOS2	SOS2	SOS Ras/Rho guanine nucleotide exchange factor 2	100138040
RALBP1	RALBP1	ralA binding protein 1	523324
ABL2	ABL2	ABL proto-oncogene 2, non-receptor tyrosine kinase	511845
PDGFRA	PDGFRA	platelet derived growth factor receptor alpha	282301
BRAP	BRAP	BRCA1 associated protein	518844
RASGRP1	RASGRP1	RAS guanyl releasing protein 1	533125
IGF1	IGF1	insulin like growth factor 1	281239
MAPK8	MAPK8	mitogen-activated protein kinase 8	539941
PAK2	PAK2	p21 (RAC1) activated kinase 2	513673
RGL2	RGL2	ral guanine nucleotide dissociation stimulator like 2	504334
CALM3	CALM3	calmodulin 3	520277

## Sheet: bta-mir-205
Table S4. Signalling pathways constructed by WebGestalt software for each differentially expressed miRNA’s target genes list.
ID: bta04520; Name: Adherens junction
size=69; overlap=9; expect=1.74; enrichmentRatio=5.19; PValue=5.187e-5; FDR=1.655e-2
User ID	Gene Symbol	Gene Name	Entrez Gene
PTPRM	PTPRM	protein tyrosine phosphatase, receptor type M	536092
SORBS1	SORBS1	sorbin and SH3 domain containing 1	504625
YES1	YES1	YES proto-oncogene 1, Src family tyrosine kinase	507632
MAPK3	MAPK3	mitogen-activated protein kinase 3	531391
ACTB	ACTB	actin beta	280979
PTPRJ	PTPRJ	protein tyrosine phosphatase, receptor type J	508150
CTNNA1	CTNNA1	catenin alpha 1	526848
INSR	INSR	insulin receptor	408017
CSNK2A1	CSNK2A1	casein kinase 2 alpha 1	282419
ID: bta04015; Name: Rap1 signaling pathway
size=210; overlap=15; expect=5.28; enrichmentRatio=2.84; PValue=2.543e-4; FDR=4.056e-2
User ID	Gene Symbol	Gene Name	Entrez Gene
VEGFA	VEGFA	vascular endothelial growth factor A	281572
MAGI2	MAGI2	membrane associated guanylate kinase, WW and PDZ domain containing 2	100298336
PLCB1	PLCB1	phospholipase C beta 1	287026
P2RY1	P2RY1	purinergic receptor P2Y1	281963
MAGI1	MAGI1	membrane associated guanylate kinase, WW and PDZ domain containing 1	783484
ANGPT2	ANGPT2	angiopoietin 2	282141
PARD6B	PARD6B	par-6 family cell polarity regulator beta	539687
MAPK3	MAPK3	mitogen-activated protein kinase 3	531391
MAGI3	MAGI3	membrane associated guanylate kinase, WW and PDZ domain containing 3	532952
ACTB	ACTB	actin beta	280979
LPAR1	LPAR1	lysophosphatidic acid receptor 1	281136
INSR	INSR	insulin receptor	408017
PRKCA	PRKCA	protein kinase C alpha	282001
CSF1	CSF1	colony stimulating factor 1	281094
SIPA1L1	SIPA1L1	signal induced proliferation associated 1 like 1	787248
