# Supplementary material for: miRNA-microbiome interplay is related to Bos indicus feed efficiency
Source: Research Square preprint supplement (doi:10.21203/rs.3.rs-4744784/v1), 2024-08-09
Supplement: Supplementary file 6 [file d830335fc0bf122d176f0917.xlsx]

## Sheet: diffexpr-results_miRNA_FEZES2
Table S3. Differentially expressed fecal miRNAs identified by DEseq software between efficient and inefficient Nelore cattle groups.
miRNA	baseMean	log2FoldChange	lfcSE	stat	pvalue	padj	..STAR.30T_Fez.clean.fastq	..STAR.32T_Fez.clean.fastq	..STAR.34T_Fez.clean.fastq	..STAR.37T_Fez.clean.fastq	..STAR.40T_Fez.clean.fastq	..STAR.46T_Fez.clean.fastq	..STAR.47T_Fez.clean.fastq	..STAR.4T_Fez.clean.fastq	..STAR.62T_Fez.clean.fastq	..STAR.72T_Fez.clean.fastq	..STAR.73T_Fez.clean.fastq	..STAR.16T_Fez.clean.fastq	..STAR.13T_Fez.clean.fastq	..STAR.41T_Fez.clean.fastq	..STAR.55T_Fez.clean.fastq	..STAR.25T_Fez.clean.fastq
bta-mir-126_9	16.0332	2.63969	0.849647	3.10681	0.105907	0.00189119	18.5354	117.51	4.0054	29.7044	119.887	114.046	19.5087	20.1455	5.54427	7.49836	8.12616	31.5674	7.23378	526.609	105.067	20.1455
bta-mir-30a_7	41.5764	2.02458	0.706594	2.86527	0.116663	0.00416655	24.0864	24.0324	13.0176	11.1132	6.99577	11.689	35.6386	41.8044	17.4249	256.098	15.4397	283.101	1.77304	117.611	5.05132	4.79656
bta-mir-196a-1_78	3.68423	1.64174	0.684213	2.39945	0.306497	0.0164195	1.26771	1.50203	2.0027	3.70438	0.777308	5.39492	0	5.57392	7.12835	9.11212	4.06308	39.5984	16.8439	256.344	16.1642	9.11345
bta-mir-205_31	2.12744	2.01166	0.980234	2.05222	0.56207	0.0401479	2.53542	0	0.500675	0	0.777308	2.69746	3.95984	5.57392	3.9602	0.95917	2.43785	106.916	68.2619	3.84035	9.09237	12.9507
bta-mir-27b_5	425.611	0.496255	0.255065	1.94561	0.579063	0.051702	272.557	351.474	443.598	330.616	343.57	639.747	403.904	409.683	345.329	595.165	546.078	15.8394	4854.58	599.575	4365.35	1626.51
bta-mir-143_1	105.806	1.10057	0.662232	1.66191	0.772254	0.0965318	53.2437	156.211	45.5615	38.896	34.2016	47.2055	71.2772	114.265	42.7701	526.105	34.1299	27.7189	0.886519	4.80044	27.2771	75.7856
bta-mir-155_71	2.3944	1.37785	0.823199	1.67378	0.772254	0.0941738	0	4.50608	1.50203	0	0.777308	2.69746	3.95984	2.78696	3.16816	2.87751	4.06308	23.7591	18.6169	14.4013	39.4003	0.959311
bta-mir-4449_53	22.5901	-0.564891	0.355115	-1.59073	0.781698	0.111671	29.1573	24.0324	26.0351	26.8568	30.315	24.2771	15.8394	27.8696	8.71243	21.5813	13.8145	51.478	11.5247	5.28049	6.06158	2.39828
bta-mir-29c_41	3.76083	-0.973569	0.662116	-1.47039	0.785682	0.141456	3.80312	0	4.50608	6.48267	11.6596	3.14704	0	2.78696	2.37612	3.3571	3.25046	320.747	4.43259	0.480044	1.01026	2.39828
bta-mir-451_51	11.5785	-1.04107	0.730884	-1.4244	0.785682	0.15433	3.80312	57.077	5.50743	5.55658	9.3277	11.2394	0	19.5087	4.75224	8.15295	2.43785	79.1969	1.77304	1.44013	3.03079	1.43897
bta-mir-17_81	1.43685	-1.3899	0.931022	-1.49288	0.785682	0.13547	1.26771	3.00405	4.0054	2.77829	0.777308	0.449577	0	0	0.792039	1.91834	0.812616	0	0.886519	1.44013	1.01026	0
bta-mir-30c_15	14.1089	0.476462	0.380489	1.25224	0.94532	0.210484	12.6771	6.0081	13.5182	12.9653	10.8823	13.9369	11.8795	27.8696	16.6328	15.8263	13.0019	87.2845	3.54607	5.28049	15.1539	10.0728
bta-mir-210_69	4.85186	-0.737046	0.600203	-1.22799	0.94532	0.219449	11.4094	1.50203	3.50473	9.26096	5.44116	2.69746	0	8.36088	3.9602	4.79585	2.43785	256.578	5.31911	10.0809	5.05132	10.0728
bta-mir-192_2	10613.1	-0.029998	0.189202	-0.158551	0.970959	0.874023	11348.5	12396.2	10243.8	8293.19	11392.2	10948.1	9036.37	10400.9	11677	10503.9	10503.9	9.5917	5.31911	2.88027	17.1745	16.3083
bta-mir-10a_3	1865.74	-0.0635797	0.275837	-0.230497	0.970959	0.817705	2553.16	2081.81	1475.49	1972.58	1471.44	2111.21	1944.28	1683.32	2575.71	1165.39	1488.71	56.1115	1.77304	11.041	22.2258	16.3083
bta-mir-10b_4	4837.14	-0.0330274	0.315738	-0.104604	0.970959	0.91669	3348.02	6843.23	5709.2	4181.32	4397.23	3692.37	8802.73	4375.53	3798.62	3626.62	4433.63	58.0298	4.43259	5.28049	2.02053	0.479656
bta-mir-215_8	1473.75	-0.230675	0.32103	-0.718546	0.970959	0.472421	1636.61	1835.48	1357.33	1051.12	2139.15	1247.57	831.567	1245.77	2213.75	899.222	1753.63	65.2236	8.86519	25.9224	24.2463	23.5031
bta-mir-141_10	580.537	0.103267	0.25662	0.402413	0.970959	0.68738	764.428	410.053	639.362	488.053	488.927	468.459	483.101	654.936	650.264	550.084	788.237	30.6566	3.54607	0.480044	4.04105	4.79656
bta-mir-30d_11	59.045	0.162829	0.292171	0.557306	0.970959	0.577318	74.7948	63.0851	46.5628	40.7482	57.5208	55.7475	39.5984	55.7392	61.7791	87.2845	66.6345	39.0174	0.886519	3.36031	3.03079	1.43897
bta-mir-186_12	174.191	0.0616438	0.28539	0.215998	0.970959	0.828989	204.101	183.247	189.255	126.875	155.462	192.419	106.916	119.839	176.625	256.578	204.779	66.887	52.3046	82.5676	25.2566	23.5031
bta-mir-10174_13	13.2443	-0.152115	0.4212	-0.361148	0.970959	0.717989	6.33854	16.5223	21.0284	12.9653	10.8823	8.99153	15.8394	13.9348	18.2169	9.5917	11.3766	19.6089	63.8293	27.3625	24.2463	27.3404
bta-mir-27a_14	34.6154	0.21864	0.402494	0.543213	0.970959	0.586983	27.8896	21.0284	38.0513	33.3395	39.6427	31.9199	27.7189	30.6566	13.4647	56.1115	60.9462	0	7.09215	5.28049	5.05132	5.27621
bta-mir-28_16	44.2265	0.0723142	0.29198	0.247668	0.970959	0.804391	48.1729	37.5507	55.575	43.5265	34.9789	50.3526	23.7591	39.0174	45.1462	58.0298	50.3822	3.92179	1.77304	1.92018	2.02053	0.959311
bta-mir-3596_17	58.8787	-0.0821296	0.26145	-0.314131	0.970959	0.753422	50.7083	49.5669	55.0743	64.8267	82.3947	54.8483	51.478	66.887	54.6507	65.2236	52.0074	0	5.31911	0.960089	3.03079	1.43897
bta-mir-200a_19	162.935	0.192388	0.360544	0.533606	0.970959	0.593614	131.842	88.6195	144.195	137.062	247.961	134.423	320.747	108.691	160.784	113.182	204.779	3.92179	10.6382	5.76053	9.09237	6.71518
bta-mir-142_21	96.3163	0.336574	0.516424	0.651739	0.970959	0.514569	223.117	43.5588	39.0527	80.5704	37.3108	194.667	79.1969	97.5436	130.686	96.3966	37.3803	3.92179	2.65956	6.24058	12.1232	8.6338
bta-mir-23a_24	24.6352	0.053746	0.402846	0.133416	0.970959	0.893865	20.2833	10.5142	35.0473	28.709	21.7646	13.9369	35.6386	27.8696	38.0179	17.2651	21.9406	43.1396	63.8293	53.765	68.6979	22.5438
bta-mir-16b_25	42.678	-0.10788	0.275417	-0.391697	0.970959	0.695282	54.5114	39.0527	35.548	50.9353	41.9746	35.5165	47.5181	36.2305	49.1064	44.1218	34.9425	15.6871	3.54607	4.3204	4.04105	3.83724
bta-mir-30b_27	35.7513	-0.0539392	0.304104	-0.177371	0.970959	0.859217	39.2989	39.0527	34.0459	39.8221	27.9831	41.361	43.5583	41.8044	34.8497	31.173	20.3154	823.575	0.886519	0.480044	1.01026	1.43897
bta-mir-429_28	91.8756	-0.276788	0.299334	-0.924682	0.970959	0.355132	109.023	135.182	84.1135	61.1223	123.592	114.642	67.3174	69.674	70.4915	100.713	74.7607	3.92179	1.77304	4.80044	4.04105	3.83724
bta-mir-16a_29	19.6571	0.214307	0.434115	0.493664	0.970959	0.621544	10.1417	10.5142	22.5304	22.2263	17.8781	12.1386	43.5583	30.6566	11.8806	14.3876	20.3154	3.92179	1.77304	5.28049	3.03079	2.39828
bta-mir-93_34	15.358	0.282954	0.399777	0.70778	0.970959	0.479082	20.2833	15.0203	15.0203	13.8914	7.77308	16.6343	3.95984	16.7218	26.9293	17.2651	15.4397	19.6089	3.54607	2.40022	3.03079	5.27621
bta-mir-182_35	37.3152	-0.100168	0.337053	-0.297189	0.970959	0.766322	22.8187	52.5709	35.548	34.2656	50.525	29.2225	35.6386	25.0826	29.3054	53.2339	42.256	3.92179	15.0708	9.60089	3.03079	5.27621
bta-mir-194-1_36	62.649	-0.121223	0.3808	-0.318338	0.970959	0.750229	59.5823	55.575	68.0919	57.418	86.2812	39.1132	47.5181	69.674	79.996	23.4997	102.39	0	98.4036	48.4845	7.07184	35.4945
bta-let-7d_39	10.5129	0.129905	0.444229	0.292429	0.970959	0.769959	5.07083	7.51013	9.01216	15.7436	9.3277	11.2394	23.7591	8.36088	8.71243	9.5917	7.31354	439.24	5.31911	2.40022	4.04105	0.959311
bta-mir-1307_42	9.18434	0.430114	0.442609	0.97177	0.970959	0.331165	10.1417	4.50608	10.5142	8.33486	5.44116	12.5881	7.91969	11.1478	7.92039	14.3876	8.12616	11.7654	22.163	24.4823	23.236	38.3724
bta-mir-342_43	7.26652	0.403558	0.52691	0.765895	0.970959	0.443739	6.33854	9.01216	1.50203	9.26096	6.99577	10.7898	7.91969	2.78696	7.12835	10.0713	8.12616	0	5.31911	2.40022	1.01026	3.83724
bta-mir-130a_44	1.38644	0.41535	0.91132	0.455768	0.970959	0.648557	2.53542	0	1.00135	0.926096	1.55462	1.79831	0	2.78696	1.58408	1.43876	1.62523	0	10.6382	11.041	5.05132	8.6338
bta-mir-194-2_45	31.9538	-0.168748	0.37631	-0.448428	0.970959	0.653845	40.5667	13.5182	40.054	31.4873	43.5293	24.7267	19.7992	39.0174	45.1462	18.7038	34.9425	0	2.65956	1.92018	2.02053	2.39828
bta-mir-196b_52	21.241	-0.108432	0.387553	-0.279787	0.970959	0.779641	15.2125	12.0162	31.5425	23.1524	24.0965	14.836	31.6788	22.2957	11.0885	22.5405	25.1911	3.92179	7.97867	8.16075	4.04105	5.75587
bta-mir-425_56	11.3524	0.111105	0.468957	0.236919	0.970959	0.81272	24.0864	4.50608	9.51283	5.55658	10.105	11.689	15.8394	11.1478	15.0487	10.0713	7.31354	7.84357	10.6382	3.36031	2.02053	3.35759
bta-mir-107_57	2.10226	-0.37464	0.833475	-0.449492	0.970959	0.653077	0	3.00405	2.50338	5.55658	1.55462	1.79831	0	2.78696	0.792039	4.31627	0.812616	66.6704	3.54607	1.92018	3.03079	7.19483
bta-mir-15b_58	12.4802	0.102243	0.424942	0.240605	0.970959	0.809861	7.60625	7.51013	13.0176	14.8175	13.2142	7.19322	23.7591	11.1478	11.8806	10.0713	17.0649	0	6.20563	8.16075	4.04105	4.79656
bta-mir-106b_62	6.66372	-0.252698	0.486916	-0.518977	0.970959	0.603777	5.07083	10.5142	5.00675	10.1871	6.99577	7.19322	3.95984	5.57392	5.54427	4.31627	8.93878	3.92179	6.20563	14.8814	6.06158	13.91
bta-mir-146b_63	4.89117	0.0579025	0.568982	0.101765	0.970959	0.918943	6.33854	4.50608	4.50608	5.55658	3.10923	8.99153	7.91969	2.78696	3.9602	2.87751	3.25046	0	3.54607	4.3204	7.07184	5.27621
bta-mir-139_64	6.8135	-0.5329	0.545766	-0.976424	0.970959	0.328854	3.80312	6.0081	8.01081	6.48267	13.9915	3.14704	3.95984	13.9348	3.16816	4.31627	8.12616	0	1.77304	1.44013	5.05132	1.91862
bta-mir-32_66	3.11894	-0.21851	0.704226	-0.310283	0.970959	0.756346	2.53542	7.51013	5.50743	0.926096	1.55462	4.04619	0	2.78696	4.75224	1.43876	3.25046	3.92179	2.65956	3.84035	2.02053	2.87793
bta-mir-147_68	3.79655	-0.568666	0.605287	-0.939499	0.970959	0.347475	8.87396	1.50203	5.00675	4.63048	3.88654	3.14704	3.95984	0	2.37612	4.31627	4.06308	7.84357	2.65956	3.84035	7.07184	3.35759
bta-mir-1388_76	3.23211	-0.149841	0.727181	-0.206058	0.970959	0.836746	1.26771	10.5142	3.00405	1.85219	1.55462	2.69746	0	5.57392	3.9602	4.31627	0.812616	0	1.77304	1.92018	3.03079	4.79656
bta-mir-484_77	1.77904	0.135179	0.847014	0.159595	0.970959	0.8732	0	3.00405	1.00135	1.85219	3.10923	3.14704	0	2.78696	0.792039	1.43876	2.43785	0	0.886519	1.92018	1.01026	1.91862
bta-mir-345_79	2.07746	-0.235775	0.78638	-0.299823	0.970959	0.764313	3.80312	3.00405	1.50203	0.926096	2.33192	2.69746	3.95984	0	2.37612	1.43876	0.812616	3.92179	1.77304	1.44013	3.03079	3.35759
bta-mir-7858_82	2.67023	-0.194247	0.809505	-0.239957	0.970959	0.810364	2.53542	0	7.00946	0.926096	2.33192	2.24788	0	8.36088	0.792039	1.91834	3.25046	0	6.20563	7.20066	4.04105	2.39828
bta-mir-130b_84	2.32249	-0.298426	0.771632	-0.386747	0.970959	0.698944	1.26771	4.50608	3.50473	1.85219	3.10923	3.59661	0	0	3.16816	0.479585	4.06308	3.92179	15.9573	53.2849	35.3592	24.9421
bta-mir-378-2_26	62.4758	0.00491785	0.28613	0.0171875	0.990844	0.986287	60.85	81.1094	60.5817	37.9699	69.1804	74.1801	75.237	69.674	57.8189	46.9993	53.6327	0	50.5316	99.3692	116.18	98.809
bta-mir-148b_40	4.95652	0.00707485	0.563834	0.0125478	0.990844	0.989989	3.80312	7.51013	4.50608	4.63048	6.99577	8.09238	0	2.78696	3.16816	8.15295	4.8757	7.84357	2.65956	2.40022	3.03079	0.479656
bta-mir-200c_47	11.2368	-0.00461135	0.401822	-0.0114761	0.990844	0.990844	8.87396	9.01216	12.5169	8.33486	14.7689	10.3403	19.7992	8.36088	10.2965	9.11212	12.1892	3.92179	27.4821	12.9612	19.195	5.27621
bta-mir-486_32	72.5773	-2.05979	0.965313	-2.13381	NA	NA	17.7479	537.725	14.5196	23.1524	27.2058	35.067	31.6788	30.6566	17.4249	51.7952	11.3766	3.92179	0	1.44013	1.01026	1.91862
bta-mir-122_72	4.96848	2.10907	1.06169	1.98653	NA	NA	3.80312	0	1.50203	0.926096	3.10923	0.449577	0	2.78696	0.792039	38.8464	2.43785	0		2.40022	1.01026	2.39828		0
